1 **Short title:**

2 **Regulation of microtubule dynamics by IQD proteins**

3

4 **Title:**

5 **IQD proteins integrate auxin and calcium signaling to regulate microtubule dynamics**  
6 **during *Arabidopsis* development**

7

8 Jos R. Wendrich<sup>1,2,3,5</sup>, Bao-Jun Yang<sup>2,3,4,5</sup>, Pieter Mijnhout<sup>1</sup>, Hong-Wei Xue<sup>4</sup>, Bert De Rybel<sup>1,2,3\*</sup>  
9 and Dolf Weijers<sup>1\*</sup>

10

11 1: Laboratory of Biochemistry, Wageningen University, Stippeneng 4, 6708 WE, Wageningen,  
12 the Netherlands

13 2: Department of Plant Biotechnology and Bioinformatics, Ghent University, Technologiepark  
14 927, 9052 Ghent, Belgium

15 3: Center for Plant Systems Biology, Vlaams Instituut voor Biotechnologie, Technologiepark  
16 927, 9052 Ghent, Belgium

17 4: National Key Laboratory of Plant Molecular Genetics, CAS Center for Excellence in  
18 Molecular Plant Sciences, Shanghai Institute of Plant Physiology and Ecology, Chinese  
19 Academy of Sciences, 300 Fenglin Road, 200032 Shanghai, China.

20 5: These authors contributed equally to this work

21

22 \* Corresponding authors:

23 - Dolf Weijers, Laboratory of Biochemistry, Wageningen University, Stippeneng 4, 6708 WE,  
24 Wageningen, the Netherlands, +31-317-482866, [dolf.weijers@wur.nl](mailto:dolf.weijers@wur.nl)

25 - Bert De Rybel, Department of Plant Biotechnology and Bioinformatics, Ghent University and  
26 Center for Plant Systems Biology Vlaams Instituut voor Biotechnologie, Technologiepark 927,  
27 9052 Ghent, Belgium, +32-93313943, [beryb@psb.vib-ugent.be](mailto:beryb@psb.vib-ugent.be)

28

29 Author contributions: D.W. conceived the project; J.R.W. and B-J.Y. designed experiments;  
30 J.R.W., B-J.Y. and P.M. performed experiments; H-W.X., B.D.R. and D.W. supervised the  
31 project; J.R.W., B.D.R. and D.W. wrote the paper with input from all authors.

32

33 **One sentence summary (max 200 char):**

34 IQD proteins integrate auxin and calcium signaling, two major signaling pathways, to control  
35 the cytoskeleton dynamics and cell shape of *Arabidopsis*.

36

37 **Keywords**

38 IQ67-domain, microtubules, SPRIAL2, auxin signaling, calcium signaling, *Arabidopsis*  
39 development

40

41 **Abstract (max 250 words)**

42 Geometry and growth and division direction of individual cells are major contributors to plant  
43 organ shape and these processes are dependent on dynamics of microtubules (MT). Different  
44 MT structures, like the cortical microtubules, preprophase band and mitotic spindle, are  
45 characterized by diverse architectural dynamics (Hashimoto, 2015). While several MT binding  
46 proteins have been identified that have various effects on MT stability and architecture, they  
47 do not discriminate between the different MT structures. It is therefore likely that specific MT  
48 binding proteins exist that differentiate between MT structures in order to allow for the  
49 differences in architectural dynamics. Although evidence for the effect of specific cues, such  
50 as light and auxin, on MT dynamics has been shown in recent years (Lindeboom *et al.*, 2013;  
51 Chen *et al.*, 2014), it remains unknown how such cues are integrated and lead to specific  
52 effects. Here we provide evidence for how auxin and calcium signaling can be integrated to  
53 modulate MT dynamics, by means of IQD proteins. We show that the *Arabidopsis* IQD15-18  
54 subclade of this family is regulated by auxin signaling, can bind calmodulins in a calcium-  
55 dependent manner and are evolutionarily conserved. Furthermore, AtIQD15-18 directly bind  
56 SPIRAL2 protein *in vitro* and *in vivo* and modulate its function, likely in a calmodulin-dependent  
57 way, thereby providing a missing link between two important regulatory pathways of MT  
58 dynamics.

59

## 60 Introduction

61 Plant organ shape is mainly controlled by the geometry of individual cells and the orientation  
62 of their cell divisions and growth axes. All these processes are highly dependent on  
63 microtubule (MT) dynamics that are part of the cytoskeleton of the cell (Lloyd and Chan, 2004).  
64 Disruption of these MT dynamics can lead to severe defects ranging from altered vesicle  
65 trafficking to misalignment of chromosomes during division and disordered division plane  
66 orientation (Kimata *et al.*, 2016). Furthermore, organization of the dynamic MTs at the cell  
67 cortex dictates the direction of cell expansion by guiding cellulose synthase complexes. In  
68 contrast, the architecture of the preprophase band (PPB) and spindle MTs appears more  
69 stable, preceding the division plane and direction of chromosomal migration during division  
70 (reviewed in Hashimoto, 2015). Interestingly, although MT binding proteins, such as KATANIN  
71 (KTN; Luptovciak *et al.*, 2017), SPIRAL2/TORTIFOLIA (SPR2; Buschmann *et al.*, 2004; Shoji  
72 *et al.*, 2004; Yao *et al.*, 2008; Nakamura *et al.*, 2018), MICROTUBULE ASSOCIATED  
73 PROTEIN65 (MAP65; Smertenko *et al.*, 2004) have different effects on MT stability and  
74 architecture, they do not discriminate between dynamic or more stable MTs and seem to  
75 reside on all MT structures found in the cell, including the cortical MT (CMT), the PPB, and  
76 the mitotic spindle. Hence it is likely that specific MT binding proteins exist that differentiate  
77 between dynamic and stable MT structures in order to allow for these differences in  
78 architectural dynamics.

79 Over the past years, several lines of evidence have shown that specific cues, such as  
80 light and auxin are able to influence MT dynamics (Lindeboom *et al.*, 2013; Chen *et al.*, 2014).  
81 However, it remains unclear how such cues could be integrated and lead to the required MT  
82 orientation. A recent study of AUXIN RESPONSE FACTOR5/ MONOPTEROS (MP)  
83 downstream target genes (Möller *et al.*, 2017), identified an overrepresentation of members  
84 of the IQ67-domain (IQD) family as being downregulated following impaired auxin response  
85 in the early embryo. The founding member of the IQD family, AtIQD1, was shown to bind  
86 Calmodulin (CaM), as well as several MT-associated proteins (Levy *et al.*, 2005;  
87 Bürstenbinder *et al.*, 2013). A recent systematic analysis of the AtIQD family revealed a  
88 diverse array of protein localization and showed that at least some IQD proteins can control  
89 MT cytoskeleton topology (Bürstenbinder *et al.*, 2017). Thus, given that both auxin and  
90 calcium modulate the MT cytoskeleton (Chen *et al.*, 2014), it is possible that IQD proteins  
91 mediate the influences of these signals on the cytoskeleton.

92 Here, we show that the *IQD15-18* subclade of *Arabidopsis* is evolutionarily conserved  
93 throughout the Embryophytes, regulated by auxin and potentially acts as an integrator of  
94 different signaling pathways. We further hypothesize that IQD15-18 control MT dynamics  
95 through modulating SPR2 activity likely in a CaM dependent way and thereby providing a  
96 missing link between these important regulatory pathways.

97

## 98 **Results**

99

### 100 *IQ67-domain gene family expression is under developmental and auxin control*

101

102 Out of the 33 members in the *Arabidopsis IQD* gene family (Abel *et al.*, 2005), a few were  
103 reported to be misregulated in embryos in which auxin response was downregulated (Möller  
104 *et al.*, 2017). To determine if *IQD* gene regulation is a significant output of auxin action, we  
105 carefully examined the expression levels of the entire *IQD* gene family upon reduced auxin  
106 signaling. Analysis of two published datasets (one performed on seedlings [Schlereth *et al.*,  
107 2010] and the other on embryos [Möller *et al.*, 2017]) revealed that expression of 13 members  
108 (~40% of the family) is misregulated upon inhibition of auxin response (Figure 1A). Several  
109 subclades appear to be co-regulated, as is evident from for example the *IQD15-18* clade, that  
110 responds similarly in both datasets. To further dissect if *IQD* genes are a direct and rapid auxin  
111 output, we assessed the effect of exogenous auxin application on the expression levels of this  
112 subclade specifically. Both qPCR and analysis of *promoter::n3GFP* fluorescence intensity  
113 after auxin treatment revealed a fast upregulation of *IQD15* transcripts (Figure 1B-C),  
114 indicating that this gene is likely a direct target of auxin signaling. Moreover, it was previously  
115 shown that *IQD15* expression was reduced in a *mp* mutant background (Möller *et al.*, 2017).  
116 Diverse transcriptional response after auxin treatment was evident from qPCR analysis on the  
117 other three *IQD* genes (Figure S1A). Indeed, putative ARF binding sites (AuxREs; Boer *et al.*,  
118 2014) could be identified in close proximity of start codons of all four *IQD* genes (Figure S1B).  
119 Taken together, this confirms that auxin is able to regulate the expression of *IQD15* and its  
120 close homologs.

121 The expression profile of the *IQD15-18* subclade was determined by analysis of  
122 *promoter::n3GFP* fusion lines throughout *Arabidopsis* developing embryos and primary root  
123 meristems. Expression of *IQD15* was observed from globular stage of embryogenesis and  
124 stayed restricted to the vascular precursor cells (Figure 1D). In the postembryonic root,  
125 expression was also mostly restricted to the vascular tissue and appeared strongest close to  
126 the QC (Figure 1D). A similar expression pattern was observed for *IQD18* (Figure 1G),  
127 although its expression was somewhat broader in the postembryonic root and expanded into  
128 the ground tissue layers and the lateral root cap (Figure 1G). *IQD16* showed a more dynamic  
129 expression pattern as it was expressed from four-cell stage of embryogenesis in the  
130 suspensor and later (from early heart stage onward) in the entire basal pro-embryo (Figure  
131 1E). In the root, expression could be observed in all tissue types except for QC and columella  
132 (Figure 1E), again expression appeared strongest closer to the QC. Finally, *IQD17* was found  
133 to complement the expression of *IQD15*, and was expressed in the suspensor of the early

134 globular embryo and the outer tissues of the epidermis and ground tissue (Figure 1F). While  
 135 similar expression was observed in the root, *IQD17* was excluded from the columella and QC  
 136 (Figure 1F). Expression could also be observed outside the context of the embryonic and  
 137 primary root (e.g. lateral roots and developing leaf primordia; Figure S2). Interestingly,  
 138 expression of *IQD15*, -16 and -18 seems to coincide with regions of high auxin signaling and  
 139 the observed auxin gradient (Liao *et al.*, 2015), consistent with their regulation by the auxin  
 140 signaling-pathway.

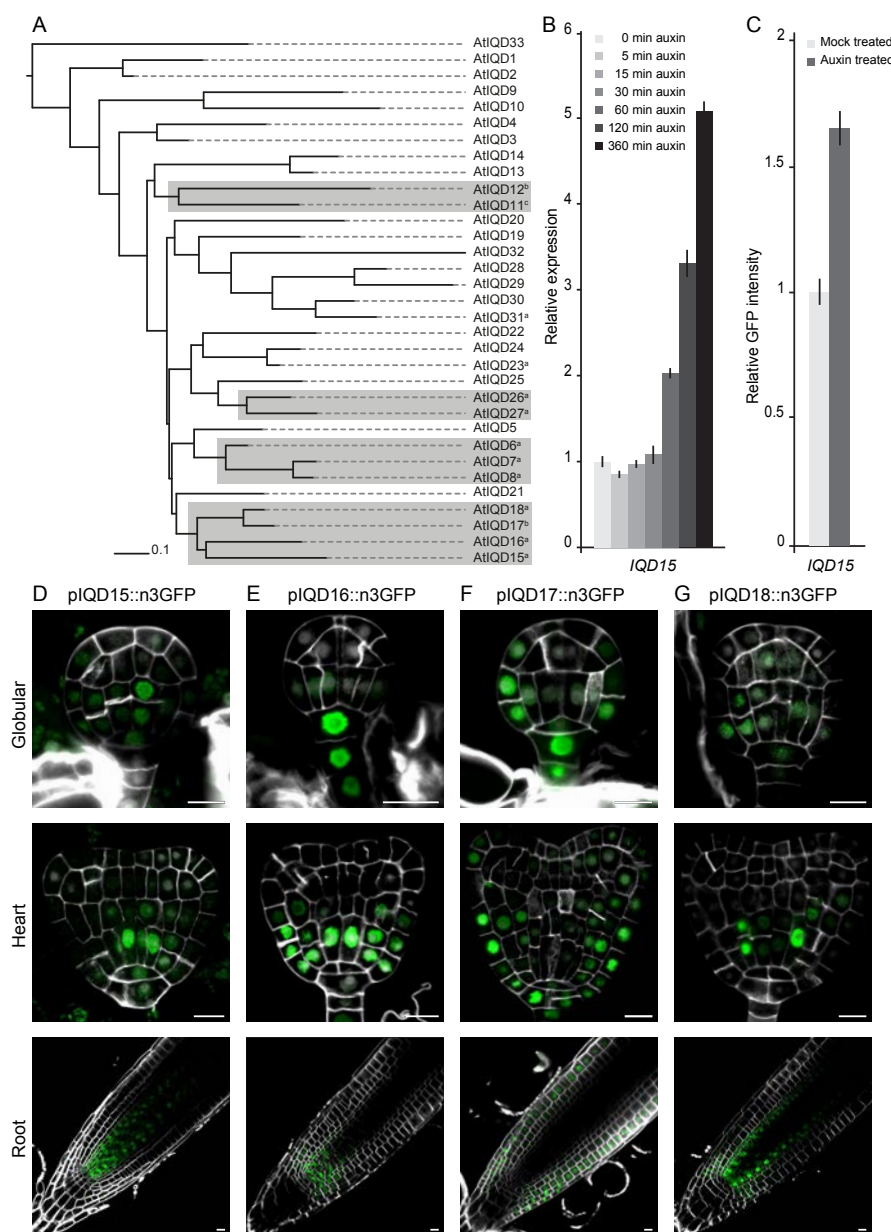

**Figure 1: IQD gene expression is under control of auxin signaling.**

(A) Phylogenetic tree of Arabidopsis IQD proteins, rooted to AtIQD33, shows co-regulation of auxin signaling in several subclades. a = >1.5 fold down in embryo array (Möller *et al.*, 2017); b = >1.5 fold down in seedling array (Schlereth *et al.*, 2010); c = >1.2 fold up in seedling array (Schlereth *et al.*, 2010). (B) Bar diagram showing relative expression of *IQD15* in Arabidopsis roots after exogenous auxin treatment for indicated time. (C) Bar diagram showing relative GFP intensity of pIQD15::n3GFP expressing root tips after overnight auxin treatment (1  $\mu$ M 2-4D). Error bars indicate SEM, n = 3 (B) / 10 (C). (D-G) Expression pattern of *IQD15-18* in globular and heart stage embryos and root tips, reveals expression in developmental regions of high auxin signaling. Measuring bar = 10  $\mu$ m.

142 *IQD proteins mark dynamic microtubule structures*

143

144 We next generated translational fusion lines of the IQD15-18 subclade to investigate their  
145 subcellular protein localization patterns. Proteins could be detected only within domains of  
146 promoter activity in both embryos and roots, suggesting that proteins do not move outside  
147 their expression domain (Figure 2A-C). Similar to previous reports (Bürstenbinder *et al.*, 2013,  
148 2017), we observed proteins in strands resembling MT-structures and found these structures  
149 to be sensitive to treatment with the MT-destabilizing drug oryzalin (Figures 2A-C). In addition  
150 to being associated to CMT, IQD18 was also found to reside in the nucleus. Not all cells  
151 showed nuclear localized IQD18 and this was especially clear in the postembryonic root where  
152 this seemed to be correlated to the developmental age of the cell (Figure 2D), indicating  
153 differential localization of IQD18 throughout the cell cycle. Further investigation into possible  
154 cell cycle regulation on the localization of IQD18 protein was performed by treatment with  
155 hydroxyurea (HU), that stalls the cell cycle in S-phase (Cools *et al.*, 2010). The number of  
156 cells with nuclear-localized IQD18 protein was significantly increased after 15 hours of  
157 treatment (Figure 3A-C), suggesting re-localization occurs before or during S-phase. Live  
158 time-lapse imaging on roots revealed a reduction of IQD18-YFP signal at the lateral sides of  
159 the cell to coincide with the appearance of nuclear-localized protein (Figure 3D, white  
160 arrowheads; Movie 1). Given that the disappearance of IQD18 protein from the lateral sides  
161 and reappearance in the nucleus occurs within minutes (Figure 3D), it is very likely that active  
162 protein re-localization takes place. At later stages of the cell cycle, as the nuclear envelope  
163 dissolves in (pro)metaphase, IQD18 protein dissipates throughout the cytoplasm, later  
164 localizes to the newly forming cell plate, and can occasionally be observed in spots in the  
165 daughter nuclei (Figure 3E-F and Movies 2 and 3). The dynamic localization of IQD18 was  
166 observed in multiple cell types, indicating a cell type-independent regulation on localization of  
167 IQD18 protein through the cell cycle.

168 As protein localization between the different members of this same subclade differs,  
169 with only IQD18 displaying nuclear accumulation, we were interested to know the ancestral  
170 localization mode within this subclade. We investigated the occurrence of *Arabidopsis thaliana*  
171 IQD15-18 (AtIQD) orthologues in a number of different species, including tomato, poplar, rice,  
172 maize, and moss (Figure 4A). All analyzed monocot species possessed only a single copy of  
173 this subclade, while all eudicots (with the exception of Medicago) had multiple, suggesting a  
174 multiplication event of this subclade occurred in eudicots (Figure 4A). This would also suggest  
175 the localization properties of a monocot orthologue to be similar to that of a common ancestor.  
176 To test this, we generated a GFP protein fusion of the rice orthologue *OsIQD14*, which has up  
177 to 61% similarity to the *Arabidopsis* genes and shares highly conserved domains (Figure S3).  
178 Interestingly, in both rice and *Arabidopsis* roots, this protein localized in a pattern that was

179 indistinguishable from that of AtIQD18, with clear microtubule association, nuclear localization,  
180 and similar behavior during the cell cycle (Figure 4B-D). This strongly suggests that AtIQD18  
181 has retained its ancestral localization properties while other members of the subclade have  
182 diversified.

183 Generally, MT-associated proteins mark both the highly dynamic cortical MT network  
184 and seemingly more stable MT structures like the PPB and the mitotic spindle (e.g. Marc *et al.*,  
185 1998; Bao *et al.*, 2001; Buschmann *et al.*, 2004; Smertenko *et al.*, 2004). Interestingly,  
186 none of the IQD proteins in the IQD15-18 clade in *Arabidopsis*, nor the rice OsIQD14 protein  
187 associated with either the PPB or the mitotic spindle (Figures 2, 3, 4 and S4 and Movies 1-3).  
188 Thus, these proteins preferentially associate with dynamic MT structures.

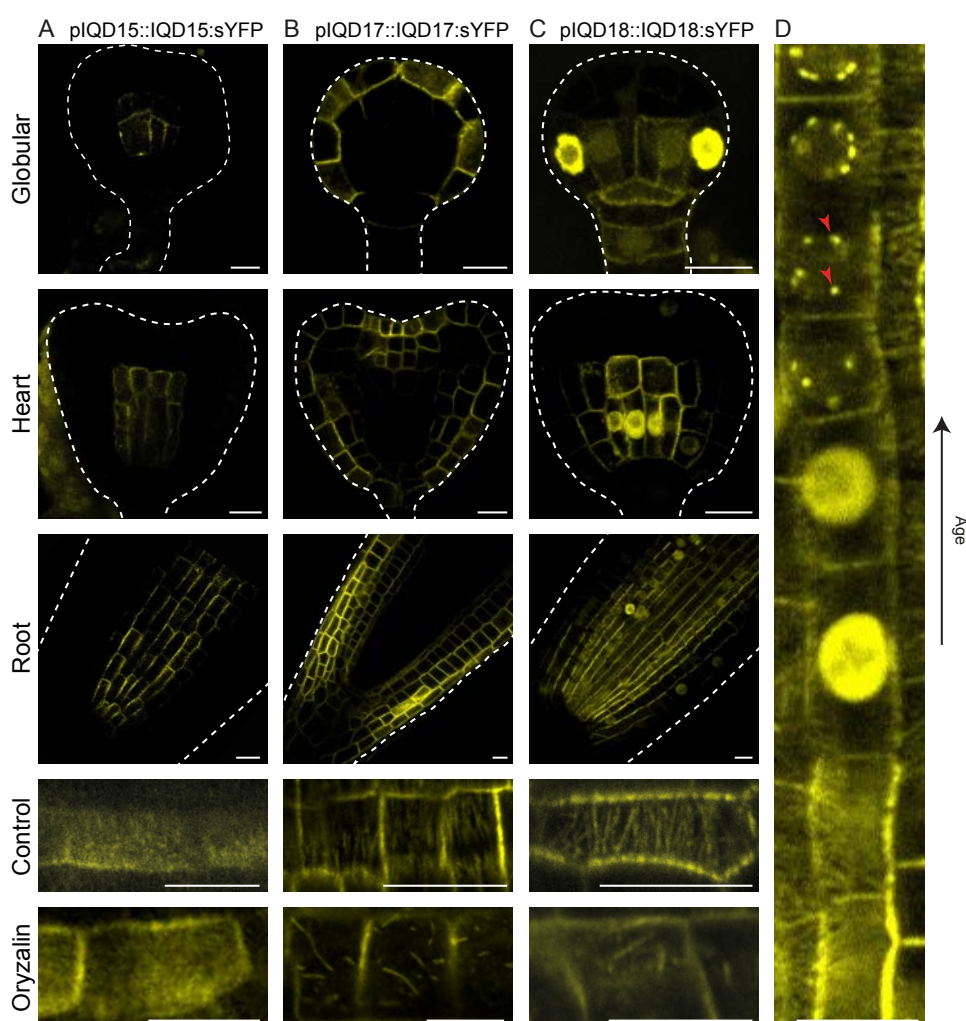

**Figure 2: IQD proteins localize to microtubules in vivo.**

Subcellular protein localization of IQD15 (A), -17 (B), and -18 (C), in globular and heart stage embryos and root tips reveals oryzalin sensitive microtubule association within expression domain. White dashed line represents embryo and root outline. (D) Dynamic protein localization of IQD18 in root tips suggests cell cycle dependent subcellular localization. Measuring bar = 10  $\mu$ m.

189

190

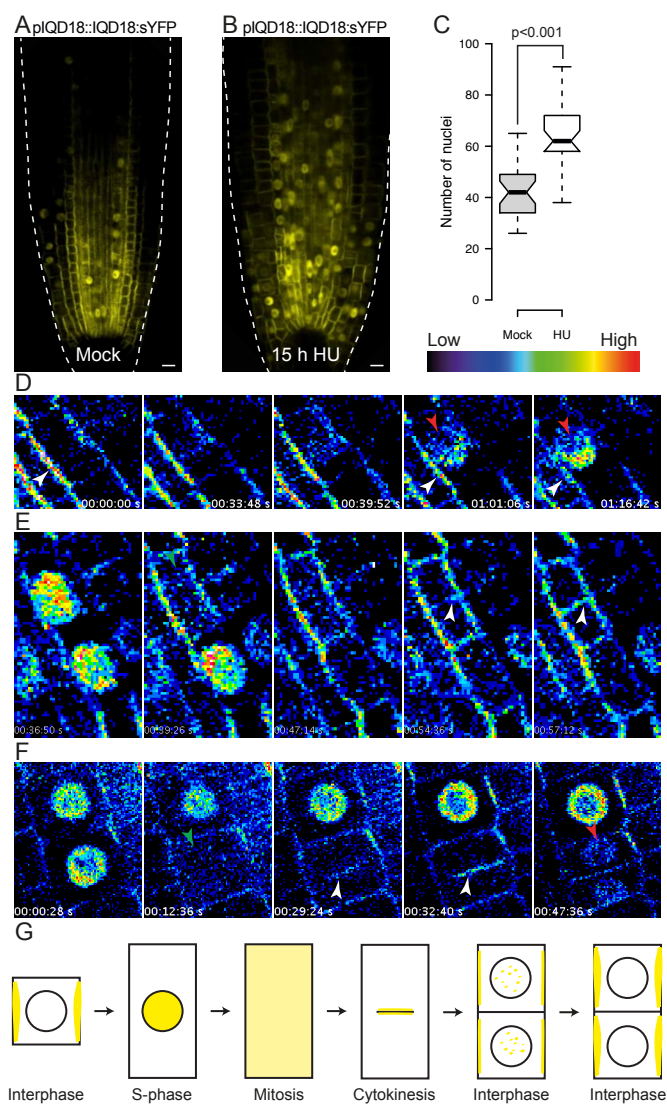

**Figure 3: Dynamic IQD18 protein localization is cell cycle dependent.** (A-C) Cell cycle arrest in S-phase (B) results in significantly increased cells with nuclear localized IQD18 protein, compared to control conditions (A).  $n = 29$ ; measuring bar = 10  $\mu\text{M}$ . (D-F) Time-lapse imaging of IQD18 protein becoming nuclear in S-phase (D) and in endodermal (E) and cortical cells (F) through division, reveals dynamic subcellular localization. (G) Schematic representation of dynamic IQD18 protein localization through different phases of cell cycle.



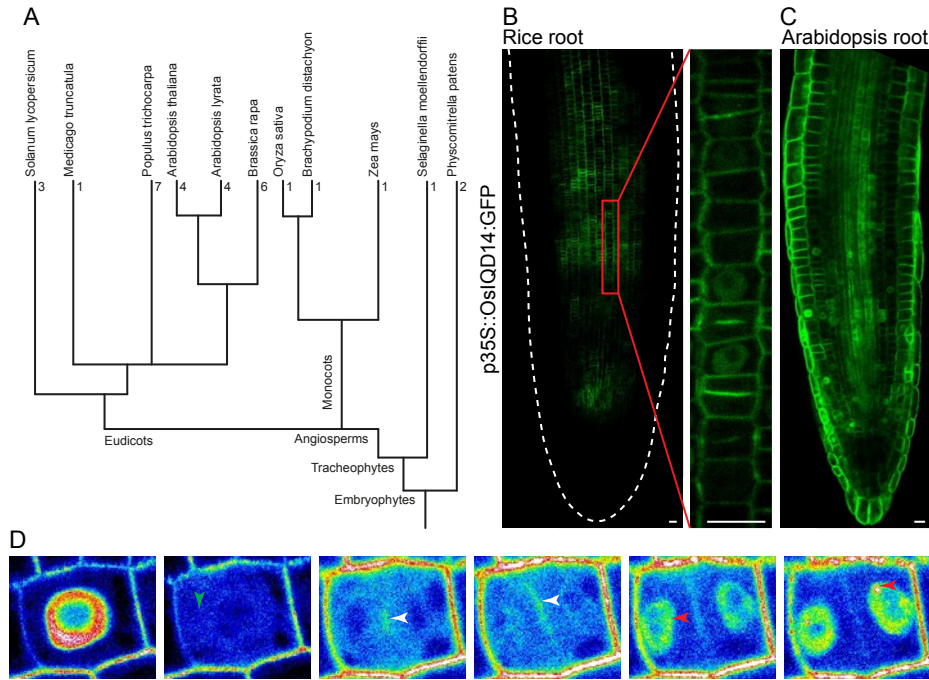

**Figure 4: IQD sequence and protein localization is evolutionarily conserved.**

(A) Phylogenetic tree of land plants annotated with number of AtIQD15-18 co-orthologs per species, shows multiplication occurring after monocot/dicot split. (B-D) Subcellular protein localization of p35s::OsIQD14:GFP in rice (B) and Arabidopsis (C) root tips and through cell division in Arabidopsis (D) reveals identical localization as AtIQD18. Measuring bar = 10 μm.

192

193 *IQDs directly bind MT's and interacts with Calmodulin and SPIRAL2 in vivo*

194

195 Association of proteins to MT can either be through direct protein-protein interaction or could  
196 alternatively be bridged by MT-binding proteins. To determine if IQD15-18 represent  
197 Microtubule-Associated Proteins (MAPs), we tested direct MT binding capabilities of AtIQD18  
198 using an *in vitro* MT Binding Protein Spin-Down assay using recombinant AtIQD18 and  
199 purified MT. This showed a clear co-sedimentation of recombinant AtIQD18 with MT (Figure  
200 5A), similar to the positive control (MAP2). Together with similar results we obtained from  
201 OsIQD14 (Yang *et al.*, 2018), this indicates an evolutionarily conserved property of IQD  
202 proteins to directly bind MT.

203

204 We next used an *in vivo* approach to identify interaction partners of AtIQDs in different  
205 developmental contexts. We performed several immunoprecipitation experiments followed by  
206 tandem-mass spectrometry (IP-MS/MS) on siliques (embryo context) or roots of plants  
207 expressing AtIQD15, -17, and -18 fusion proteins under control of their endogenous promoter.  
208 As previously reported for IQD1 (Bürstenbinder *et al.*, 2013), we found Calmodulin (CaM) and  
209 Calmodulin-like (CML) proteins as well as Tubulin to associate with all three IQD proteins  
210 tested (Figures 5B and S7, Table 1 and S1). We next used Yeast-Two-Hybrid (Y2H) and  
211 Bimolecular Fluorescence Complementation (BiFC) to determine if interactions with these  
CaM/CML proteins are based on direct protein-protein interactions. Y2H showed that both

212 IQD17 and IQD18 directly interact with different CaM proteins (Figure S5). BiFC confirmed the  
213 interaction between IQD18 and CaM1 (Figure S6), and furthermore showed that this  
214 interaction occurs at MT structures (Figure S6A' and B'). Since CaM proteins are not by  
215 themselves known to interact with MTs (Bürstenbinder *et al.*, 2013), it is likely that IQD18  
216 recruits CaM1 to MTs, a property that we also observed for OsIQD14 (Yang *et al.*, 2018).

217 In addition to confirming MT and CaM/CML interactions, our IP-MS/MS experiments  
218 identified a range of novel IQD-interacting proteins. These included a Glycine-rich protein, a  
219 kinesin, ANGUSTIFOLIA, and several members of the 14-3-3 type GF14 proteins (Figures 5B  
220 and S7, Table 1 and S1). Interestingly, IQDs were also found to bind the SPIRAL2 (SPR2)  
221 protein (Table 1). SPR2 was recently found to bind the minus-end of MT and is characterized  
222 by its loss-of-function phenotype of spiraling tissues (Buschmann *et al.*, 2004; Shoji *et al.*,  
223 2004; Wightman *et al.*, 2013; Nakamura *et al.*, 2018; Leong *et al.*, 2018). IQD18 and SPR2  
224 proteins directly interacted in Y2H (Figure S8A) and BiFC assays showed that also these  
225 interactions occurred at MT structures (Figure S8B).

226 SPR2 is an important regulator of MT dynamics, but no interactors or regulators have  
227 so far been identified. To determine if the interactions revealed in IQD IP-MS/MS are  
228 representative of SPR2 protein function, we also carried out similar experiments with  
229 p35S::SPR2:GFP (Shoji *et al.*, 2004). This revealed an overlapping interactome between IQDs  
230 and SPR2, including several of the same CaMs/CMLs and 14-3-3 GF14 proteins (Table S1  
231 and Figure S9). We did not find any IQD proteins, but might be due to their low protein  
232 abundance and tissue specific expression, compared to ubiquitous SPR2 protein  
233 accumulation.

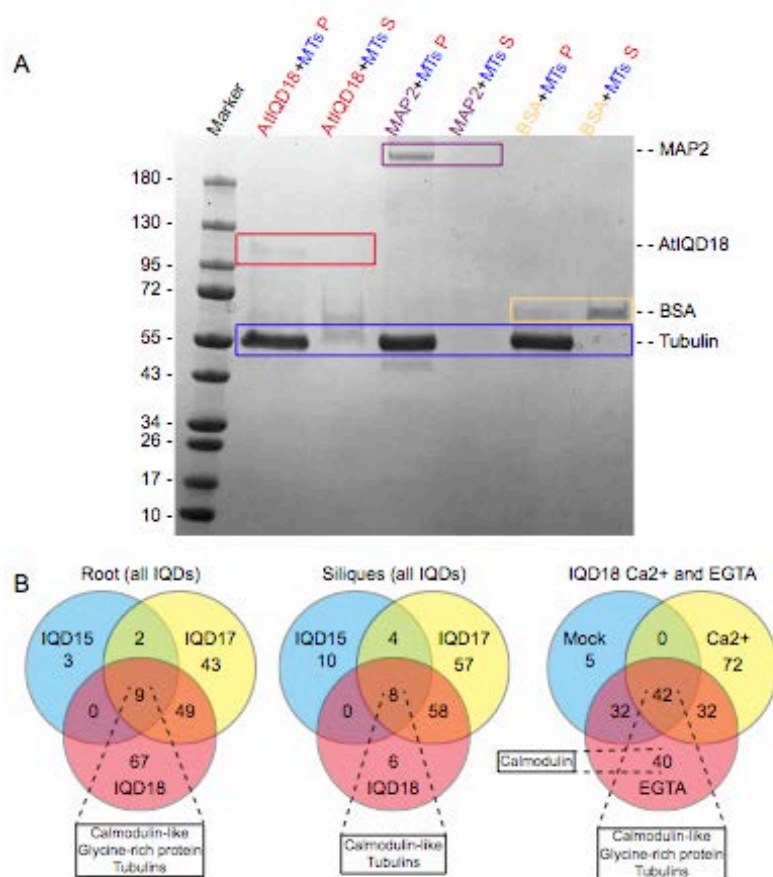

**Figure 5: IQD proteins directly bind microtubules in vitro and associate with Calmodulins in vivo.**

(A) in vitro MT binding assay reveals direct binding between AtIQD18 and, similar to positive control MAP2. AtIQD18 is outlined in red, positive control MAP2 in purple, negative control BSA in yellow and Tubulin in blue. P = pellet fraction; S = supernatant fraction. (B) Venn diagrams portraying IP-MS/MS experiments on AtIQD15, -17, and -18 roots and siliques, reveal overlapping interactions with Calmodulins and tubulins.

234

235 *Calcium modulates the assembly of MT complexes*

236

237 Given that IQD proteins interact directly with several CaM/CML proteins, and that this  
 238 interaction likely recruits CaM/CML proteins to MTs, we asked if calcium would affect the IQD  
 239 protein interactome. We therefore performed independent IP-MS/MS experiments on roots of  
 240 a IQD18-YFP line in high or low calcium conditions (by addition of either 100 mM CaCl<sub>2</sub> or 20  
 241 mM EGTA, respectively). Through statistical analysis, we identified several proteins that show  
 242 differential binding in either condition (Table 1 and S1 and Figure S10). Among these proteins,  
 243 we also found several CaM proteins that showed more prominent binding in low-calcium  
 244 conditions (Table 1). This suggests that calcium, presumably through binding to CaM/CML  
 245 proteins, modulates their ability to bind IQD proteins. We tested this directly by quantifying the  
 246 binding of recombinant IQD18 protein to CaM-containing beads in the presence of buffer,  
 247 EGTA or calcium. This showed that indeed, calcium increased the binding of IQD18 to this  
 248 generic model CaM protein, showing that IQD-CaM interactions can be modulated by calcium

249 in a reconstituted *in vitro* system (Figure S11). Hence, the calcium-induced changes in  
250 CaM/CML protein association in the IP-MS/MS experiments are likely also mediated by direct  
251 effects of calcium on CaM/CML proteins. Importantly, not only the IQD-CaM/CML interactions  
252 were affected by calcium and EGTA treatment, also the association of SPR2 was modulated  
253 in these experiments (Table 1; Yang *et al.*, 2018). This reveals new cellular effects of calcium  
254 in plant cells: recruitment of CaM/CML to MTs, and modulation of the IQD-SPR2 association.

255

256 *Nuclear localization of IQD proteins is important for proper calcium responses*

257

258 Among the IQD15-18 clade, IQD18 is the most dynamic in its subcellular localization, a  
259 property that is shared with its rice orthologue OsIQD14 (Figures 3 and 4). It is likely that this  
260 regulated localization is important for protein function, and we used a misexpression strategy  
261 to alter IQD18 protein levels and localization. We first generated a line expressing this protein  
262 under control of the strong meristematic *RPS5A* promoter (Weijers *et al.*, 2001) and fused with  
263 sYFP (*pRPS5A::IQD18:sYFP*; R18). This line showed similar localization patterns as  
264 observed in the genomic fusion line, with CMT and nuclear localized protein, in both embryos  
265 and root tips (Figure 6A). We did not observe any obvious phenotypic changes in these  
266 misexpression lines in embryos nor in roots. We then cultured seedlings in EGTA to limit the  
267 endogenous calcium levels. This treatment strongly inhibited root growth in wild-type plants,  
268 and we found that R18 lines were more sensitive to EGTA-induced root growth inhibition  
269 (Figure 6E).

270 We next exploited the increased sensitivity to EGTA as a measure for biological activity  
271 of IQD18 protein, and asked which subcellular localization is associated with activity. We  
272 generated *Arabidopsis* lines expressing fusion proteins with three different localization tags to  
273 alter the subcellular localization of the AtIQD18 protein. We made use of an N-terminal fused  
274 myristoylation tag (MYR; Traverso *et al.*, 2013) for membrane anchoring  
275 (*pRPS5A::MYR:IQD18:sYFP*; MYR18), an N-terminal nuclear localization signal (NLS; Lange  
276 *et al.*, 2007) for increased nuclear targeting (*pRPS5A::NLS:IQD18:sYFP*; NLS18), and a C-  
277 terminal nuclear export signal (NES; Gallagher and Benfey, 2009) for export out of the nucleus  
278 (*pRPS5A::IQD18:NES:sYFP*; 18NES). All tags appeared to function properly, as we observed  
279 increased subcellular localizations at the expected sites in all lines. Interestingly, while neither  
280 the NLS or the NES conferred exclusive localization in- or outside the nucleus, membrane  
281 anchoring by means of the MYR-tag seemed to fully localize AtIQD18 to the membrane and  
282 completely abolished nuclear localization (Figure 6B-D).

283 Both lines with increased nuclear AtIQD18 (i.e. R18 and NLS18) showed EGTA  
284 hypersensitivity, while lines with no or reduced nuclear-localized AtIQD18 (i.e. MYR18 and

285 18NES), showed EGTA resistance (Figure 6E). This suggests that nuclear localization of this  
 286 protein is important for proper calcium responses in the root.

287 IQD15-18 genes are expressed most prominently in young, dividing tissues, which overlaps  
 288 mostly with the activity domain of the *RPS5A* promoter (Weijers *et al.*, 2001). To misexpress  
 289 IQD18 outside of its normal expression domain, we next expressed AtIQD18 protein fused to  
 290 GFP, under control of the Cauliflower mosaic virus 35S promoter. Similar to what was  
 291 previously reported for AtIQD16 (Bürstenbinder *et al.*, 2017), we observed strong phenotypes  
 292 in these lines (Figure 6F). Specifically, cotyledons showed strong spiraling (Figure 6G).  
 293 Interestingly, this phenotype strongly resembles the spiraling phenotype observed in mutants  
 294 that affect the MT cytoskeleton (Hashimoto, 2002), including *SPR2* (Furutani *et al.*, 2000;  
 295 Buschmann *et al.*, 2004; Shoji *et al.*, 2004). This suggests that IQD proteins control the MT  
 296 cytoskeleton, presumably through their interaction with *SPR2*.

297 Together, these results strongly indicate that IQD proteins are a new class of proteins  
 298 that can directly bind and affect MT. With a wide array of interacting proteins, they could  
 299 function as integrator of signals, regulating MT dynamics.

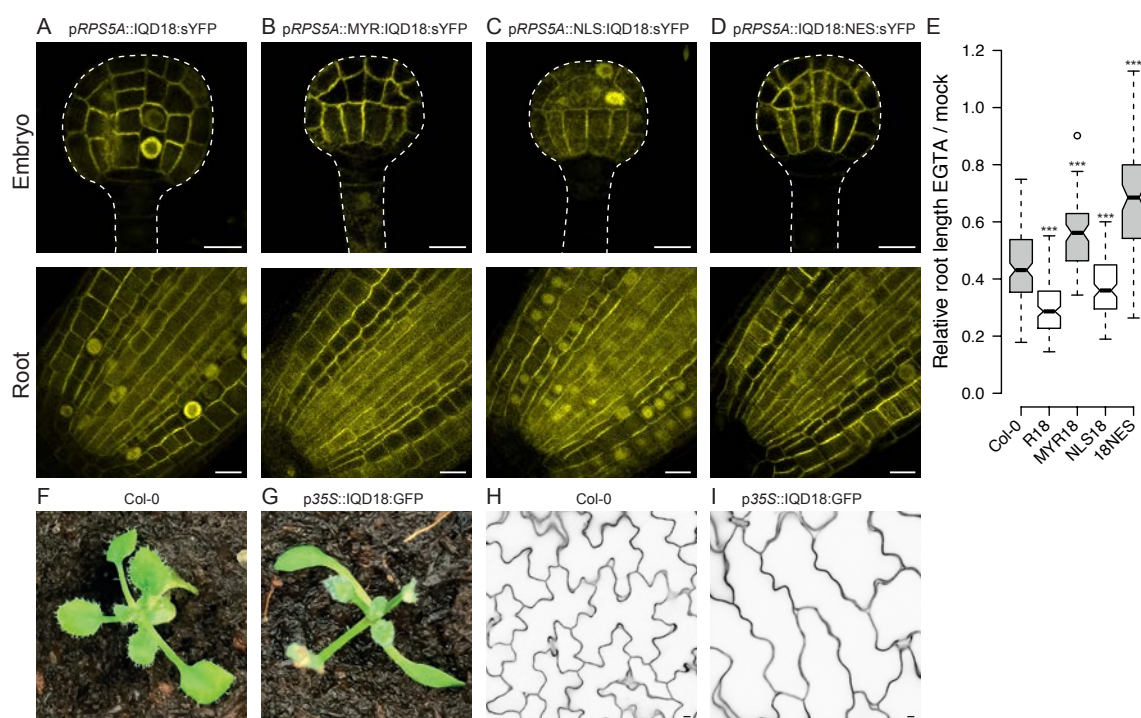

**Figure 6: Nuclear localization of AtIQD18 is important for proper calcium signaling and misexpression leads to spr2-like phenotypes.**

(A-E) Misexpression and mislocalization of AtIQD18 by means of RPS5A promoter (A) and myristoylation (B; MYR), nuclear localization (C; NLS), and nuclear export (D; NES) tags, results in altered calcium signaling and reveals a role for nuclear localization in this process (E). (F-J) Overexpression of AtIQD18 results in spr2-like phenotypes of spiraling cotyledons (G) compared to wild-type (F) and stretched and less complex cotyledon pavement cells (I-J). Measuring bar = 10  $\mu$ M.

300

301

## 302 Discussion

303

304 Auxin has a profound effect of the organization of the CMT in plant cells, however, how auxin  
305 mechanistically affects and generates potential for dynamic MT organization, remains  
306 unknown. Here we provide evidence for a missing link that can connect auxin signaling to  
307 downstream MT modulators, through an evolutionarily conserved subclade of the IQD family  
308 as integrator of different signals. While we were unable to find single loss of function mutants  
309 that showed altered development, likely due to redundant action of the studied subclade (data  
310 not shown), mutations in the single rice orthologue have significant effects on grain size and  
311 quality (Yang *et al.*, 2018), showing the importance of this protein family for development.  
312 Recent studies on the family of IQ67-domain proteins (Bürstenbinder *et al.*, 2017; Sugiyama  
313 *et al.*, 2017) have shed light on their potential to alter MT stability and organization in different  
314 contexts. We show that the subclade of *AtIQD15-18* genes is transcriptionally regulated by  
315 auxin signaling and that these genes are expressed in the developmental regions that  
316 correspond to high signaling. Furthermore, we show that the IQD proteins can directly bind to  
317 CaM and MT *in vitro* and that they preferentially localize to the dynamic CMT structures, *in*  
318 *vivo*. The interaction between IQD and CaM was found to be modulated by calcium.  
319 Interestingly, co-overexpression of a CaM with OsIQD14 was recently found to suppress IQD  
320 function and restore its phenotype (Yang *et al.*, 2018). This suggests that calcium signaling is  
321 able to control the interactions of IQD proteins and thereby modulate their function. Calcium  
322 signaling was in turn found to be dependent on correct localization of IQD proteins, as altering  
323 the nuclear localization properties of IQD18 resulted in impaired responses. Although the  
324 precise role of nuclear-localized IQD protein remains unclear, this could involve parts of the  
325 nuclear calcium signaling (Charpentier and Oldroyd, 2013), as for example interactions with a  
326 nuclear ion channel were also observed (Table S1). Moreover, we identified novel IQD-  
327 interacting proteins, including the MT minus-end binding protein SPR2. We were able to  
328 confirm that this is a direct interaction and also that this interaction can be modulated by  
329 calcium, which suggests an auxin-calcium-IQD-SPR2 pathway could be controlling MT  
330 dynamics. In our efforts to confirm IQD-SPR2 interaction we identified novel interactors of  
331 SPR2, including a phosphatase and a kinase, in addition to an overlapping interactome  
332 between IQD and SPR2 (Table S1). Considering that phosphorylation was proposed as a  
333 regulatory mechanism for SPR2 (Wightman *et al.*, 2013), this provides valuable insights for  
334 future research directions on the regulation of this protein.

335 We propose a model for how auxin mediates MT dynamics and organization, through  
336 the action of IQD proteins (Figure 7). Through (slow) transcriptional regulation on the  
337 expression of *IQD* genes, auxin potentiates control on the MT organization. Calcium levels  
338 are well known to increase after an auxin peak (Monshausen *et al.*, 2011; Monshausen, 2012)

339 and this will mediate fast auxin-dependent regulation on MT organization: In resting conditions  
340 (low calcium concentrations), IQD proteins bind to SPR2 and thereby inhibiting its function to  
341 stabilize MT minus ends (Nakamura *et al.*, 2018; Leong *et al.*, 2018), leading to higher stability  
342 of the MT structure (less dynamicity). In an event of an auxin peak, calcium levels will rise  
343 leading to higher affinity between CaM and IQD (Yang *et al.*, 2018 and this study), which will  
344 free SPR2 to bind MT minus ends and thereby increasing stability of branching MT and  
345 increasing dynamicity of the MT architecture. This model is further supported by the finding  
346 that overexpression of CaM represses IQD function, as shown by a rescue of the *spr2*-like  
347 phenotype (Yang *et al.*, 2018). Under normal physiological conditions, these processes will be  
348 highly coordinated and slight differences in concentration of signaling molecules will locally  
349 affect binding affinities between the different components and thus have a fine-tuned effect on  
350 MT organization. In this way, IQD proteins contribute to the integration of signals from both  
351 auxin and calcium signaling to modulate the MT dynamics and architecture, affecting for  
352 example rice grain size and quality (Yang *et al.*, 2018). What remains unclear and will be  
353 interesting for future studies, is how the cell cycle-dependent subcellular localization of these  
354 proteins contributes to this process, what function these proteins play during *Arabidopsis*  
355 development, as well as how the diverse localization of the *Arabidopsis* IQD15-18 proteins  
356 are integrated in a redundant function.

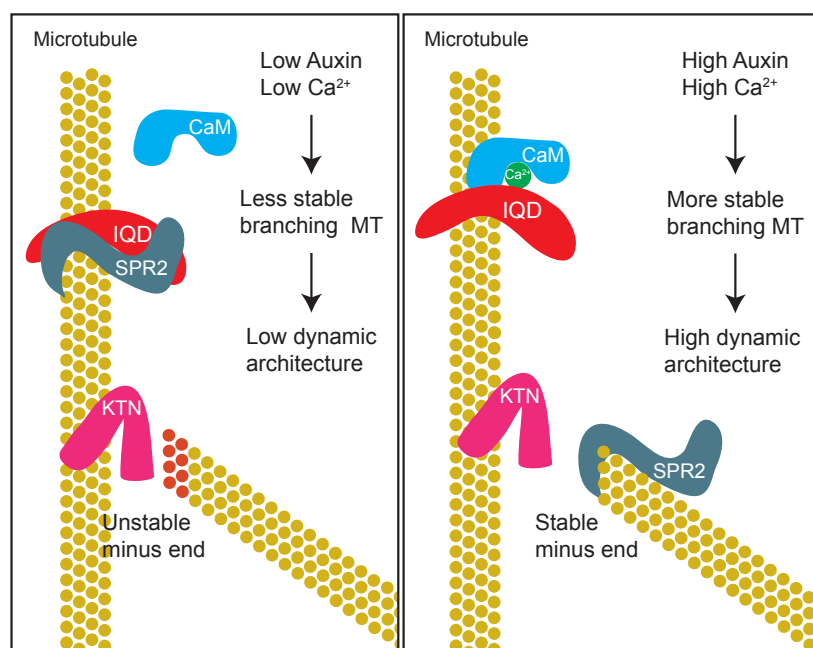

357 **Figure 7: Proposed model for IQD function on MT dynamics**

358

## 359 **Methods**

### 360 *Genome mining and phylogenetic tree assembly*

361 Multiple sequence alignment was performed on protein sequences of all (full length)  
362 *Arabidopsis* IQD proteins, and a phylogenetic tree was assembled using only non-gap  
363 generating sequences, using MAFFT (Kato and Standley, 2013) and AtIQD33 was used to  
364 root the tree. Protein sequences of AtIQD15-18 were used as query in a BLAST to find related  
365 proteins in transcriptome databases of different species (i.e. *Solanum lycopersicum*, *Medicago*  
366 *truncatula*, *Populus trichocarpa*, *Arabidopsis lyrata*, *Brassica rapa*, *Oryza sativa*,  
367 *Brachipodium distachyon*, *Zea mays*, *Selaginella moellendorffii*, and *Physcomitrella patens*).  
368 Reciprocal BLAST on *Arabidopsis* protein database was used to filter the recovered hits and  
369 only those hits that resulted in AtIQD15-18 as top hits were kept.

370

### 371 *Plant materials and growth conditions*

372 Previously described plant lines expressing p35S::SPIRAL2:GFP (Shoji *et al.*, 2004) and  
373 p35S::OslIQD14:GFP (Yang *et al.*, 2018) were used. Seeds were surface sterilized and grown  
374 on ½ MS (Duchefa) plates under standard continuous light growth conditions at 21 °C following  
375 a one to four-day stratification at 4 °C. *Arabidopsis* ecotype Columbia-0 was used as wild-type  
376 control in all cases. Chemical and hormone treatments were performed by either germinating  
377 seeds on supplemented media or transferring seedlings from normal media to supplemented  
378 media and continuing growth for indicated time.

379

### 380 *Cloning and plant transformation*

381 Promoter fragments (up to 5 kb upstream of start codon), translational genomic fusions  
382 (promoter fragment plus coding genomic fragment) and coding sequences (CDS) were  
383 amplified from genomic DNA (promoter and genomic) or root cDNA (CDS) using PCR and  
384 Phusion Flash master mix (Thermo Scientific) or Q5 DNA polymerase (New England BioLabs)  
385 and the primers described in Table S2. PCR products were cloned into the pPLV4\_v2  
386 (promoter) or pPLV16 (genomic) vectors using Ligation Independent Cloning (LIC; De Rybel  
387 *et al.*, 2011; Wendrich *et al.*, 2015a). For misexpression and mislocalization coding sequences  
388 were cloned into pPLV28 using LIC (De Rybel *et al.*, 2011; Wendrich *et al.*, 2015a) or  
389 pDONR221 using Gateway cloning (Karimi *et al.*, 2007) and different mislocalization tags were  
390 added during PCR using primers listed in Table S2. All constructs were confirmed by Sanger  
391 sequencing and transformed into *Arabidopsis* Col-0 wild-type plants through *Agrobacterium*  
392 mediated transformation. At least three independent transformants were checked and  
393 representative pictures are shown.

394

### 395 *Microscopic analysis*



396 Confocal Laser Scanning Microscopy (CLSM) was performed, as described previously  
397 (Llavata *et al.*, 2013; Wendrich *et al.*, 2015b), on Leica SP5 and SP8X (CLSM) systems. Five-  
398 day-old seedling roots were stained with propidium iodide (PI) for 2 minutes and imaged by  
399 excitation at 488nm or 514nm and detection 600-700nm (PI). Embryos were examined by  
400 isolating ovules and fixing them in a 4% paraformaldehyde / 5% glycerol in PBS solution  
401 containing 1.5% SCRI Renaissance Stain 2200 (R2200; Renaissance Chemicals, UK), before  
402 extruding embryos and imaging R2200 at 405nm excitation and detection between 430-  
403 470nm. GFP, YFP and RFP were respectively imaged by excitation at 488nm, 515nm or  
404 561nm and detection at 500-535nm, 535-600nm or 600-700nm.

405

#### 406 *RNA extraction and qRT-PCR*

407 RNA was extracted from five-day-old *Arabidopsis* seedlings or seedling roots using TriZol  
408 (Invitrogen) and subsequently subjected to column purification using an RNeasy Plant kit  
409 (Qiagen) following manufacturer's instructions. Normalized amounts of RNA were used to  
410 synthesize cDNA using an iScript kit (Bio-rad). Relative expression of target genes was  
411 measured by quantitative-real-time-PCR (qPCR), the primers listed in Table S2, and  
412 expression values were normalized against *ACTIN2* and *EEF1*, using qBase software  
413 (Hellemans *et al.*, 2007).

414

#### 415 *Yeast-Two-Hybrid (Y2H)*

416 Interaction of AtIQD17, AtIQD18 and SPR2 (or CaM1/2/3) was detected by standard yeast  
417 two-hybrid analysis following the manufacturer's instructions (Clontech). cDNAs encoding  
418 IQD18, SPR2, CaM1 were subcloned into pGBKT7 and pGADT7 vector, resulting in the fusion  
419 of IQD18-AD, SPR2-AD, CaM1-AD, SPR2-BD and CaM1-BD respectively (AD, activating  
420 domain; BD, binding domain). Yeast transformants were spotted on the restricted SD medium  
421 (SD-Leu/-Trp, short as SD-L/T) and selective medium (SD-Leu/-Trp/-His/, short as SD-L/T/H).

422

#### 423 *Bimolecular fluorescence complementation (BiFC)*

424 For BiFC (Bimolecular Fluorescence Complementation) assay, cDNAs encoding *IQD18*,  
425 *SPR2* or *CaM1* were cloned into p35S:YFPN or p35S:YFPC vector by gateway LR reaction,  
426 resulting in constructs expressing IQD18-cYFP, SPR2-nYFP, CaM1-nYFP, respectively.  
427 Resultant constructs with control blank vectors were co-expressed in *N. benthamiana* leaves  
428 and yellow fluorescence was observed by Leica SP8 confocal microscope using an argon  
429 laser excitation wavelength of 488 nm after infiltration for 3 days.

430

#### 431 *Recombinant Expression of AtIQD18 and microtubule spin down assay*

432 Coding sequence of AtIQD18 was amplified by PCR (primers *IQD18-COLD-P1/2*) and  
433 subcloned into pCold-HF for expression of IQD18-His fusion protein. After confirmation by  
434 sequencing, the construct was transformed into *E. coli* BL21(DE3) cells and expression of the  
435 fusion protein was induced by adding isopropyl- $\beta$ -D-thiogalactoside (IPTG; final concentration  
436 1mM) at 16°C overnight. Cells were lysed by sonication in lysis buffer (50 mM NaH<sub>2</sub>PO<sub>4</sub>, 300  
437 mM NaCl and 10 mM imidazole, pH 8.0) and AtIQD18-His protein was purified using Ni-NTA  
438 His Bind Resin (Novagen) according to the manufacturer's protocols.

439 *In vitro* microtubule-binding assay was performed using Microtubule Binding Protein  
440 Spin-down Assay Kit (Cytoskeleton). Briefly, 5  $\mu$ g purified AtIQD18-His, MAP2 (positive  
441 control) and BSA (negative control) proteins were respectively incubated with 10  $\mu$ g  
442 prepolymerized bovine brain tubulin in general tubulin buffer (80 mM PIPES, pH 7.0, 2 mM  
443 MgCl<sub>2</sub>, and 0.5 mM EGTA) containing 20  $\mu$ M taxol. Following centrifugation at 100,000 x g,  
444 both soluble and pellet fractions were analyzed by SDS-PAGE and Coomassie Brilliant Blue  
445 staining.

446

#### 447 *Calmodulin binding assay*

448 Calmodulin binding assay were performed as described before (Levy *et al.*, 2005) with some  
449 modifications.

450 For expression of CaM4-GST, a full-length cDNA fragment encoding the CaM4 was  
451 cloned into pDEST-GST using Gateway (Invitrogen). The recombinant CaM4 protein was  
452 expressed in BL21(DE3) at 30 °C for 4 h by induction with 1 mM IPTG. Bacterial cells were  
453 harvested and sonicated in Lysis buffer (50mM Tris-HCL, 150mM NaCl). After centrifugation,  
454 the supernatant was used for incubating with GST agroase.

455 Aliquots of 100  $\mu$ L of CaM4-GST beads, pre-equilibrated with Lysis buffer, were mixed  
456 with 500  $\mu$ L of bacterial supernatant supplemented with 2 mM CaCl<sub>2</sub> or 5 mM EGTA and  
457 incubated for 1 h at 4 °C under gentle shaking. CaM4-GST beads were sedimented by  
458 centrifugation and washed four times with 500  $\mu$ L of Lysis buffer, followed by a final wash with  
459 100  $\mu$ L of the same solution. The bound proteins were eluted by boiling the beads for 2 min in  
460 100 $\mu$ L of 4x SDS sample buffer. Proteins of the total extract, the initial supernatant, the last  
461 wash, and the pellet fraction were analyzed by SDS-PAGE and western blot by His antibody.

462

#### 463 *Immunoprecipitation followed by tandem mass-spectrometry (IP-MS/MS)*

464 IP-MS/MS was performed, as previously described by Wendrich *et al.* (2017), on up to 3 grams  
465 of siliques and five-day-old seedling roots of transgenic *Arabidopsis* plants harboring  
466 translational fusion constructs of *pIQD15::gIQD15:sYFP*, *pIQD17::gIQD17:sYFP*,  
467 *pIQD18::gIQD18:sYFP*, and whole seedlings harboring *p35S::SPR2:GFP* (Shoji *et al.*, 2004).  
468 The same material from Col-0 wild-type plants was collected as control sample. Each sample

469 was performed in triplicate for follow-up statistical analysis. Calcium and EGTA treatments  
470 were performed by respectively adding 100 mM and 20 mM during the protein extraction  
471 phase.

472

473 *Image processing and measurements*

474 All image measurements were performed using ImageJ software and this software was also  
475 used for further processing of images. Brightness and contrast levels were globally adjusted  
476 and images were cropped and placed on a matching background for ecstatic reasons.

477

#### 478 **Acknowledgements**

479 The authors would like to acknowledge Daniël Van Damme and Steffen Vanneste for  
480 stimulating discussions; Jan Willem Borst and the MicroSpectroscopy Centre Wageningen for  
481 microscopy equipment and assistance; Sjef Boeren and VIB's Proteomics Expertise Center  
482 (PEC) for MS analysis. Work in the lab of D.W. was supported by European Research Council  
483 Starting Grant CELLPATTERN 281573; B.D.R. was funded by The Research Foundation -  
484 Flanders (FWO; Odysseus II G0D0515N and 12D1815N) and Netherlands Organization for  
485 Scientific Research (NWO; VIDI 864.13.00).

486

487  
488  
489  
490

**Table 1: Overview of selected protein groups identified through IP-MS/MS**

Selected identified main protein groups are shown, ratios were calculated compared to the wild-type control and p-values by means of a Student's t-test (n=3); Stickiness is calculated from the occurrence of the identified protein group among an unpublished dataset of 86 independent IP-MS/MS experiments; ND = Not Detected; NA = Not applicable

| Tissue                                          | Bait               |          |          |          |                    |          |          |          |                    |          |            |          |               |          |            |          |          |          | Stickiness |
|-------------------------------------------------|--------------------|----------|----------|----------|--------------------|----------|----------|----------|--------------------|----------|------------|----------|---------------|----------|------------|----------|----------|----------|------------|
|                                                 | p/QD15::IQD15:sYFP |          |          |          | p/QD17::IQD17:sYFP |          |          |          | p/QD18::IQD18:sYFP |          |            |          |               |          |            |          |          |          |            |
|                                                 | Roots              |          | Siliques |          | Roots              |          | Siliques |          | Roots              |          | Roots/Mock |          | Roots/Calcium |          | Roots/EGTA |          | Siliques |          |            |
| Main protein (group)                            | Ratio              | p-value  | Ratio    | p-value  | Ratio              | p-value  | Ratio    | p-value  | Ratio              | p-value  | Ratio      | p-value  | Ratio         | p-value  | Ratio      | p-value  | Ratio    | p-value  |            |
| YFP                                             | 75.51              | 5.60E-04 | 512.89   | 4.99E-06 | 6474.63            | 1.90E-04 | 897.78   | 3.59E-07 | 1105.62            | 5.09E-07 | 606.71     | 1.32E-03 | 154.04        | 3.77E-04 | 429.51     | 9.11E-05 | 636.98   | 7.28E-06 | NA         |
| IQD15                                           | 2165.67            | 6.34E-07 | 1044.99  | 1.10E-07 | ND                 | ND       | ND       | ND       | ND                 | ND       | ND         | ND       | ND            | ND       | ND         | ND       | ND       | ND       | 3.49%      |
| IQD17                                           | ND                 | ND       | ND       | ND       | 43529.76           | 1.52E-08 | 7313.65  | 1.92E-07 | 11.96              | 0.11     | 13.03      | 3.81E-03 | 10.07         | 2.51E-03 | 26.78      | 4.56E-04 | 2277.96  | 3.55E-04 | 6.98%      |
| IQD18                                           | ND                 | ND       | ND       | ND       | 43529.76           | 1.52E-08 | ND       | ND       | 19745.71           | 6.47E-08 | 2883.42    | 2.86E-04 | 2304.25       | 1.87E-05 | 7293.64    | 1.71E-06 | 3671.33  | 8.88E-08 | 5.81%      |
| Calmodulin-like13                               | 136.35             | 1.21E-06 | 109.46   | 2.28E-05 | 1470.01            | 4.61E-08 | 367.55   | 1.09E-05 | 1603.52            | 1.28E-07 | 358.48     | 3.87E-04 | 160.36        | 8.76E-04 | 653.44     | 2.80E-04 | 80.86    | 2.66E-06 | 17.44%     |
| Calmodulin-like14                               | ND                 | ND       | ND       | ND       | ND                 | ND       | 150.09   | 7.01E-07 | 140.25             | 1.36E-07 | 23.86      | 1.35E-06 | 2.07          | 0.53     | 43.81      | 6.12E-06 | ND       | ND       | 16.28%     |
| Calmodulin (family)                             | ND                 | ND       | ND       | ND       | 27.31              | 0.16     | ND       | ND       | 2.81               | 5.03E-03 | 1.07       | 0.42     | 0.84          | 0.53     | 20.33      | 1.55E-04 | ND       | ND       | 26.74%     |
| Kinesin-like Calmodulin-binding protein ZWICHEL | ND                 | ND       | ND       | ND       | ND                 | ND       | ND       | ND       | 35.56              | 3.57E-05 | ND         | ND       | ND            | ND       | ND         | ND       | ND       | ND       | 3.49%      |
| TUBULIN A (family)                              | ND                 | ND       | 16.00    | 0.16     | 25.58              | 0.1      | 528.53   | 6.81E-03 | 19.84              | 1.30E-01 | 5.41       | 7.74E-03 | 30.61         | 1.76E-04 | 8.46       | 9.04E-04 | 286.56   | 9.76E-03 | 62.79%     |
| TUBULIN B (family)                              | 11.41              | 0.11     | 12.74    | 5.40E-02 | 150.43             | 1.20E-04 | 844.72   | 5.71E-08 | 122.50             | 3.41E-06 | 27.20      | 1.01E-02 | 100.57        | 2.98E-03 | 68.35      | 4.38E-03 | 297.41   | 1.19E-08 | 44.19%     |
| 14-3-3 GF14 (family)                            | 14.70              | 0.11     | 17.08    | 9.20E-02 | 508.29             | 2.97E-05 | 1137.99  | 1.02E-09 | 302.59             | 6.57E-07 | 52.16      | 1.03E-03 | 17.60         | 1.65E-03 | 41.93      | 6.52E-04 | 369.72   | 3.32E-08 | 40.70%     |
| Glycine-rich uncharacterized protein            | 116.77             | 5.56E-06 | ND       | ND       | 1490.14            | 5.94E-10 | ND       | ND       | 78.40              | 8.54E-06 | 4.74       | 0.37     | 4.83          | 1.74E-03 | 28.75      | 8.03E-05 | ND       | ND       | 17.44%     |
| SPIRAL2                                         | ND                 | ND       | ND       | ND       | 123.90             | 2.80E-07 | 22.91    | 1.88E-09 | 573.63             | 3.24E-07 | 37.55      | 1.37E-02 | 31.00         | 3.66E-05 | 117.65     | 2.45E-05 | 13.44    | 4.80E-06 | 6.98%      |
| ANGUSTIFOLIA                                    | ND                 | ND       | ND       | ND       | 3307.45            | 1.52E-07 | 2218.24  | 7.13E-08 | 1099.45            | 5.89E-09 | 61.66      | 4.66E-02 | 102.10        | 2.19E-04 | 159.95     | 3.57E-05 | 180.20   | 2.36E-07 | 16.28%     |
| ACTIN (family)                                  | 10.71              | 0.30     | ND       | ND       | 31.50              | 0.15     | 112.94   | 3.32E-02 | 145.38             | 2.52E-05 | 4.30       | 1.91E-02 | 7.03          | 2.33E-04 | 8.21       | 3.47E-04 | 36.57    | 7.27E-02 | 45.35%     |
| Protein kinase                                  | ND                 | ND       | ND       | ND       | 2944.88            | 1.37E-08 | 986.50   | 5.03E-07 | 1092.15            | 1.47E-08 | ND         | ND       | ND            | ND       | ND         | ND       | 119.75   | 6.85E-07 | 15.12%     |
| BIG Auxin transporter                           | ND                 | ND       | ND       | ND       | 15.08              | 1.50E-04 | 162.35   | 1.05E-05 | 50.72              | 5.52E-08 | 1.80       | 0.39     | 3.25          | 1.24E-02 | 3.55       | 1.35E-02 | 12.32    | 0.12     | 12.79%     |

491

492

493 **Literature cited**

494 Abel, S., Savchenko, T. and Levy, M. (2005). "Genome-wide comparative analysis of the IQD  
495 gene families in *Arabidopsis thaliana* and *Oryza sativa*." *BMC Evol Biol* 5: 72.

496 Bao, Y., Kost, B. and Chua, N. H. (2001). "Reduced expression of alpha-tubulin genes in  
497 *Arabidopsis thaliana* specifically affects root growth and morphology, root hair  
498 development and root gravitropism." *Plant J* 28(2): 145-157.

499 Boer, D. R., Freire-Rios, A., van den Berg, W. A., Saaki, T., Manfield, I. W., Kepinski, S.,  
500 Lopez-Vidrieo, I., Franco-Zorrilla, J. M., de Vries, S. C., Solano, R., Weijers, D. and Coll,  
501 M. (2014). "Structural basis for DNA binding specificity by the auxin-dependent ARF  
502 transcription factors." *Cell* 156(3): 577-589.

503 Bürstenbinder, K., Moller, B., Plotner, R., Stamm, G., Hause, G., Mitra, D. and Abel, S. (2017).  
504 "The IQD Family of Calmodulin-Binding Proteins Links Calcium Signaling to  
505 Microtubules, Membrane Subdomains, and the Nucleus." *Plant Physiol* 173(3): 1692-  
506 1708.

507 Bürstenbinder, K., Savchenko, T., Muller, J., Adamson, A. W., Stamm, G., Kwong, R., Zipp,  
508 B. J., Dinesh, D. C. and Abel, S. (2013). "Arabidopsis calmodulin-binding protein IQ67-  
509 domain 1 localizes to microtubules and interacts with kinesin light chain-related protein-  
510 1." *J Biol Chem* 288(3): 1871-1882.

511 Buschmann, H., Fabri, C. O., Hauptmann, M., Hutzler, P., Laux, T., Lloyd, C. W. and  
512 Schaffner, A. R. (2004). "Helical growth of the *Arabidopsis* mutant *tortifolia1* reveals a  
513 plant-specific microtubule-associated protein." *Curr Biol* 14(16): 1515-1521.

514 Charpentier, M. and Oldroyd, G. E. (2013). "Nuclear calcium signaling in plants." *Plant Physiol*  
515 163(2): 496-503.

516 Chen, X., Grandont, L., Li, H., Hauschild, R., Paque, S., Abuzeineh, A., Rakusova, H.,  
517 Benkova, E., Perrot-Rechenmann, C. and Friml, J. (2014). "Inhibition of cell expansion  
518 by rapid ABP1-mediated auxin effect on microtubules." *Nature* 516(7529): 90-93.

519 Cools, T., Iantcheva, A., Maes, S., Van den Daele, H. and De Veylder, L. (2010). "A replication  
520 stress-induced synchronization method for *Arabidopsis thaliana* root meristems." *Plant*  
521 *J* 64(4): 705-714.

522 De Rybel, B., van den Berg, W., Lokerse, A., Liao, C. Y., van Mourik, H., Möller, B., Peris, C.  
523 L. and Weijers, D. (2011). "A versatile set of ligation-independent cloning vectors for  
524 functional studies in plants." *Plant Physiol* 156(3): 1292-1299.

525 Furutani, I., Watanabe, Y., Prieto, R., Masukawa, M., Suzuki, K., Naoi, K., Thitamadee, S.,  
526 Shikanai, T. and Hashimoto, T. (2000). "The SPIRAL genes are required for directional  
527 control of cell elongation in *Arabidopsis thaliana*." *Development* 127(20): 4443-4453.

- 528 Gallagher, K. L. and Benfey, P. N. (2009). "Both the conserved GRAS domain and nuclear  
529 localization are required for SHORT-ROOT movement." *Plant J* 57(5): 785-797.
- 530 Hashimoto, T. (2002). "Molecular genetic analysis of left-right handedness in plants." *Philos*  
531 *Trans R Soc Lond B Biol Sci* 357(1422): 799-808.
- 532 Hashimoto, T. (2015). "Microtubules in plants." *Arabidopsis Book* 13: e0179.
- 533 Hellemans, J., Mortier, G., De Paepe, A., Speleman, F. and Vandesompele, J. (2007). "qBase  
534 relative quantification framework and software for management and automated analysis  
535 of real-time quantitative PCR data." *Genome Biol* 8(2): R19.
- 536 Katoh, K. and Standley, D. M. (2013). "MAFFT multiple sequence alignment software version  
537 7: improvements in performance and usability." *Mol Biol Evol* 30(4): 772-780.
- 538 Kimata, Y., Higaki, T., Kawashima, T., Kurihara, D., Sato, Y., Yamada, T., Hasezawa, S.,  
539 Berger, F., Higashiyama, T. and Ueda, M. (2016). "Cytoskeleton dynamics control the  
540 first asymmetric cell division in *Arabidopsis* zygote." *Proc Natl Acad Sci U S A* 113(49):  
541 14157-14162.
- 542 Lange, A., Mills, R. E., Lange, C. J., Stewart, M., Devine, S. E. and Corbett, A. H. (2007).  
543 "Classical nuclear localization signals: definition, function, and interaction with importin  
544 alpha." *J Biol Chem* 282(8): 5101-5105.
- 545 Leong, S. Y., Yamada, M., Yanagisawa, N. and Goshima, G. (2018). "SPIRAL2 stabilises  
546 endoplasmic microtubule minus ends in the moss *Physcomitrella patens*." *Cell Struct*  
547 *Funct*.
- 548 Levy, M., Wang, Q., Kaspi, R., Parrella, M. P. and Abel, S. (2005). "Arabidopsis IQD1, a novel  
549 calmodulin-binding nuclear protein, stimulates glucosinolate accumulation and plant  
550 defense." *Plant J* 43(1): 79-96.
- 551 Liao, C. Y., Smet, W., Brunoud, G., Yoshida, S., Vernoux, T. and Weijers, D. (2015).  
552 "Reporters for sensitive and quantitative measurement of auxin response." *Nat Methods*  
553 12(3): 207-210, 202 p 210.
- 554 Lindeboom, J. J., Nakamura, M., Hibbel, A., Shundyak, K., Gutierrez, R., Ketelaar, T., Emons,  
555 A. M., Mulder, B. M., Kirik, V. and Ehrhardt, D. W. (2013). "A mechanism for reorientation  
556 of cortical microtubule arrays driven by microtubule severing." *Science* 342(6163):  
557 1245533.
- 558 Llavata-Peris, C., Lokerse, A., Möller, B., De Rybel, B. and Weijers, D. (2013). "Imaging of  
559 phenotypes, gene expression, and protein localization during embryonic root formation  
560 in *Arabidopsis*." *Methods Mol Biol* 959: 137-148.
- 561 Lloyd, C. and Chan, J. (2004). "Microtubules and the shape of plants to come." *Nat Rev Mol*  
562 *Cell Biol* 5(1): 13-22.

- 563 Luptovciak, I., Komis, G., Takac, T., Ovecka, M. and Samaj, J. (2017). "Katanin: A Sword  
564 Cutting Microtubules for Cellular, Developmental, and Physiological Purposes." *Front*  
565 *Plant Sci* 8: 1982.
- 566 Marc, J., Granger, C. L., Brincat, J., Fisher, D. D., Kao, T., McCubbin, A. G. and Cyr, R. J.  
567 (1998). "A GFP-MAP4 reporter gene for visualizing cortical microtubule rearrangements  
568 in living epidermal cells." *Plant Cell* 10(11): 1927-1940.
- 569 Möller, B. K., Ten Hove, C. A., Xiang, D., Williams, N., Lopez, L. G., Yoshida, S., Smit, M.,  
570 Datla, R. and Weijers, D. (2017). "Auxin response cell-autonomously controls ground  
571 tissue initiation in the early Arabidopsis embryo." *Proc Natl Acad Sci U S A* 114(12):  
572 E2533-E2539.
- 573 Monshausen, G. B. (2012). "Visualizing Ca(2+) signatures in plants." *Curr Opin Plant Biol*  
574 15(6): 677-682.
- 575 Monshausen, G. B., Miller, N. D., Murphy, A. S. and Gilroy, S. (2011). "Dynamics of auxin-  
576 dependent Ca<sup>2+</sup> and pH signaling in root growth revealed by integrating high-resolution  
577 imaging with automated computer vision-based analysis." *Plant J* 65(2): 309-318.
- 578 Nakamura, M., Lindeboom, J. J., Saltini, M., Mulder, B. M. and Ehrhardt, D. W. (2018). "SPR2  
579 protects minus ends to promote severing and reorientation of plant cortical microtubule  
580 arrays." *J Cell Biol*.
- 581 Schlereth, A., Möller, B., Liu, W., Kientz, M., Flipse, J., Rademacher, E. H., Schmid, M.,  
582 Jurgens, G. and Weijers, D. (2010). "MONOPTEROS controls embryonic root initiation  
583 by regulating a mobile transcription factor." *Nature* 464(7290): 913-916.
- 584 Shoji, T., Narita, N. N., Hayashi, K., Asada, J., Hamada, T., Sonobe, S., Nakajima, K. and  
585 Hashimoto, T. (2004). "Plant-specific microtubule-associated protein SPIRAL2 is  
586 required for anisotropic growth in Arabidopsis." *Plant Physiol* 136(4): 3933-3944.
- 587 Smertenko, A. P., Chang, H. Y., Wagner, V., Kaloriti, D., Fenyk, S., Sonobe, S., Lloyd, C.,  
588 Hauser, M. T. and Hussey, P. J. (2004). "The Arabidopsis microtubule-associated  
589 protein AtMAP65-1: molecular analysis of its microtubule bundling activity." *Plant Cell*  
590 16(8): 2035-2047.
- 591 Sugiyama, Y., Wakazaki, M., Toyooka, K., Fukuda, H. and Oda, Y. (2017). "A Novel Plasma  
592 Membrane-Anchored Protein Regulates Xylem Cell-Wall Deposition through  
593 Microtubule-Dependent Lateral Inhibition of Rho GTPase Domains." *Curr Biol*.
- 594 Traverso, J. A., Micalella, C., Martinez, A., Brown, S. C., Satiat-Jeunemaitre, B., Meinel, T.  
595 and Giglione, C. (2013). "Roles of N-terminal fatty acid acylations in membrane  
596 compartment partitioning: Arabidopsis h-type thioredoxins as a case study." *Plant Cell*  
597 25(3): 1056-1077.

- 598 Weijers, D., Franke-van Dijk, M., Vencken, R. J., Quint, A., Hooykaas, P. and Offringa, R.  
599 (2001). "An Arabidopsis Minute-like phenotype caused by a semi-dominant mutation in  
600 a RIBOSOMAL PROTEIN S5 gene." *Development* 128(21): 4289-4299.
- 601 Wendrich, J. R., Boeren, S., Möller, B. K., Weijers, D. and De Rybel, B. (2017). "In Vivo  
602 Identification of Plant Protein Complexes Using IP-MS/MS." *Methods Mol Biol* 1497:  
603 147-158.
- 604 Wendrich, J. R., Liao, C. Y., van den Berg, W. A., De Rybel, B. and Weijers, D. (2015a).  
605 "Ligation-independent cloning for plant research." *Methods Mol Biol* 1284: 421-431.
- 606 Wendrich, J. R., Möller, B. K., Uddin, B., Radoeva, T., Lokerse, A. S., De Rybel, B. and  
607 Weijers, D. (2015b). "A set of domain-specific markers in the Arabidopsis embryo." *Plant*  
608 *Reprod* 28(3-4): 153-160.
- 609 Wightman, R., Chomicki, G., Kumar, M., Carr, P. and Turner, S. R. (2013). "SPIRAL2  
610 determines plant microtubule organization by modulating microtubule severing." *Curr*  
611 *Biol* 23(19): 1902-1907.
- 612 Yang, B-J., Wendrich, J.R., De Rybel, B., Weijers, D. and Xue, H-W. (submitted). "OsIQD14  
613 regulates rice grain shape through modulating the microtubule cytoskeleton"
- 614 Yao, M., Wakamatsu, Y., Itoh, T. J., Shoji, T. and Hashimoto, T. (2008). "Arabidopsis SPIRAL2  
615 promotes uninterrupted microtubule growth by suppressing the pause state of  
616 microtubule dynamics." *J Cell Sci* 121(Pt 14): 2372-2381.
- 617



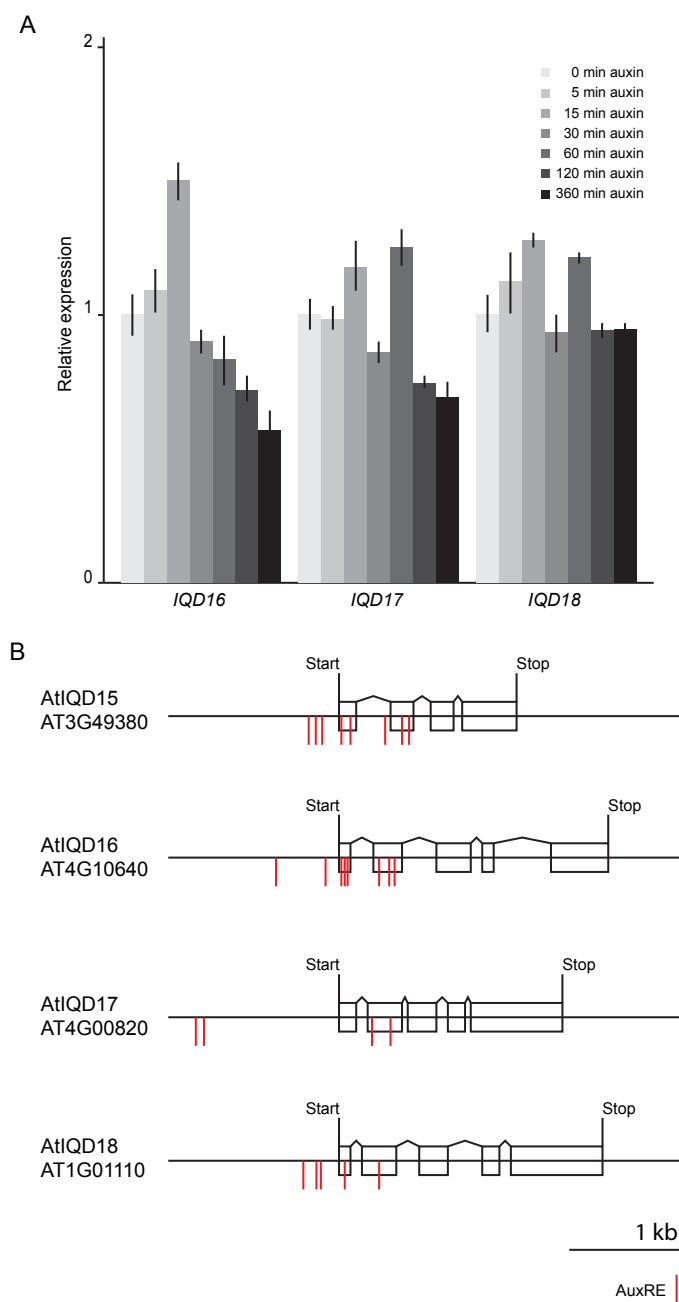

**Figure S1:** Potential for auxin regulation on IQD genes. (A) Bar diagram showing relative expression of AtIQD16-18 transcripts in Arabidopsis roots after exogenous auxin treatment for indicated time. (B) Schematic representation of genomic regions of AtIQD15-18. Blocks represent exons, lines connection the blocks represent introns. Red lines indicate possible auxin responsive elements close to the translational start site.

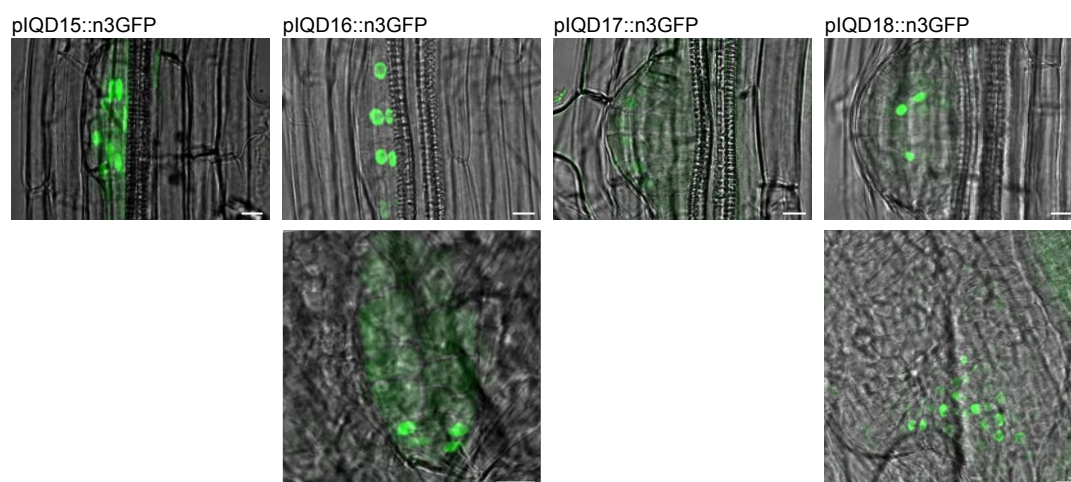

**Figure S2:** AtIQD expression in lateral root (top) and leaf primordia (bottom), reveals strong expression of AtIQD15, -16 and -18 in young lateral root primordia and weak expression of AtIQD17. AtIQD16 and -18 expression could also be observed in developing leaf primordia of 6-day-old seedlings. Measuring bar = 10  $\mu$ M.

```

AtIQD15 MGKTDG--SSWFTAVKNVFRSPEKLIPIRRINRRQDNDLVEEVEDELHQRPKRRKRRLWLFK
AtIQD16 MAKKNG--TSWFTAVKKILWSPSKDSDKKTHH-----HKETDIKRKEKKGWIFR
AtIQD17 MGKKGSSSSSWLTAVKRAFPRSPKKEHNNNAHG-----N-EVDEDEDKKKEKRRWLFK
AtIQD18 MGKKNK--SSSWLTAVKRAFPRSPKDDH-----N-DVEEDEEKREKRRWF-R
OsIQD14 MGKKAAGTSSWLTAVKRAFPRSPKDDSPNKAAR-----LRDDTDDDKGKREKRRWLFK
*.*.*.*:*:*:*:*:*:*:*:*:*:*:*:*:*:*:*:*:*:*:*:*:*:*:*:*:*:*:*:*:*:*:*
: : : : : : : : : : : : : : : : : : : : : : : : : : : : : : : : : : : : :

AtIQD15 KVSSDPCAINV-GINTT-----STAINAIAAEETEK
AtIQD16 KTKLETNSVLQHTV-----RTVEA--EEKEKPPVIVSSVEE---
AtIQD17 KSTNHDSVPKTSQVGDAPAQKSTETTIIINPTVLSSVTEQRYDASTPPATVSAASE-TH
AtIQD18 KPATQESPVKSSGISPPAPQEDSLNVNSKPSPE-----TAPSYATTTPPSNAGKPPSAV
OsIQD14 KSSSPSPAPP---TPPPQQQQQQSRAAAVT-----EEQRHAILAVATAAATAA
*
:
:

AtIQD15 TVSPAAKETVFFCRTSVYLKRRHVAAILIQTAFRGCLARTAVRALKGVVQLQALVRGHNVR
AtIQD16 ---GVTEIVKLTATPGFIRRHWAIIIQTAFRGYLSRRALRALKGLVKLQALVRGHNVR
AtIQD17 PPS-TTKEPLNLTTRTYTAREDYAAVVIQTGFRGYLARRALRALKGLVKLQALVRGHNVR
AtIQD18 PIA-TSASKTLAPRRIYYARENYAAVVIQTSFRGYLARRALRALKGLVKLQALVRGHNVR
OsIQD14 TAQAAAEVVRLTRPSSSFVREHYAAIVVQTAFRGYLARRALRALKGLVKLQALVRGHNVR
:..*:*:*:*:*:*:*:*:*:*:*:*:*:*:*:*:*:*:*:*:*:*:*:*:*
:

AtIQD15 RRTSITLQVQALVRIQALALDHRKKLTTKLGDIE-----
AtIQD16 NQAKLTLCIKALVRVQDQVLNHHQQQRSLVLL-SPP-SRNYNIEARRNSMFAESNGFWD
AtIQD17 KQAKMTRLRQALVRVQSRVLDQRKRLSHDGSRRSAF-----SDTQSVLE
AtIQD18 KQAKMTRLRQALVRVQSRVLDQRKRLSHDGSRRSAF-----SDSHAVFE
OsIQD14 KQANMTRLRQALVRVQARVDRQMRSLSDSISLSAAAASAAPCGSSKSSYSVDTSTFW
: : : : : : : : : : * : : : :
:

AtIQD15 -----S
AtIQD16 TKTYLQDIRS--RRSLSRDMN-----RCNNEFYSEETELILQKKLEIAIKREKAQA
AtIQD17 S--RYLQEISD--RRSM--SREGS--SIAEDWDRPHTIEEVKAMLQRRDNALRRESNNS
AtIQD18 S--RYLQDLS--RQSM--SREGS--SAAEDWDRPHTIDAVKVMLQRRTALRHDKT-N
OsIQD14 S--KYTHDFAAADRRSIERSRDGSFAAGDDWDRPHTIEIQAMLQTRKDAALKRE--A
:

AtIQD15 YSHAFSKQMWRTMEREAA--HSESELEDKRPRLNGYQETGRM-----ST
AtIQD16 L--ALSNQIRSRSSRNQSAAG--DDRELLERTQWLDWRMATKQWDDTTNS-----
AtIQD17 ISQAFSHQVRRTRGSYST---GDEYEEERPKWLDWRMASKPWDKR-----AST
AtIQD18 LSQAFSQKMWRTVGNQSTEGHHEVELEEBERPKWLDWRMATRPWDKR-----ASS
OsIQD14 LSYAFSHQIWRNPAPSVE-----EMDVGQPRWAERWMASRASFDTSRSTVRSAAAAAPG
*:*:*:*:*:*:*:*:*:*:*:*:*:*:*:*:*:*:*:*:*:*:*:*:*
: : : : :
:

AtIQD15 D--QAIVEPVKIVEIDKYNNT-----YSHHQ-----
AtIQD16 ---TNVRDPIKTLAVTTH-----HHQRSYPATPP
AtIQD17 DQRVP--PVYKTVIEDTSQPYLTRGNSRTGASPSRSQRPSPPSRSHHYQQHNFSSATPS
AtIQD18 RASVDQVSVKTVIEDTSQPYRTGA---GSPSRGQRPSPPSRSHHYQSRNNFSATPS
OsIQD14 RASTDHRDQVKTLEIDTARPPFSYSTPRRHGNASYHA--SSSPMH---RAHHHSVPVTPS
*:*:*:*:*:*:*:*:*:*:*:*:*:*:*:*:*:*:*:*:*:*:*:*
: : : : :
:

AtIQD15 -----LNDQTPR--G-----NSFVTR
AtIQD16 SCRASRSVMVRASPRIPCS-----
AtIQD17 PAKSR-PIQIRASPRIQRD---DRSAYNYSNTPLRSNYSFTARSYGSVCTTTTA
AtIQD18 PAKSR-PILIRASPRCQRDPREDRDRAAYSYSNTPLRSNYSFTARSYGSISTTMV-N
OsIQD14 PSKARPPIQVRSASPRVERGGGG---GSYTPSLHSHHH-----ASSG
: : : : : * * *
:

AtIQD15 QAHSIPNYMSTTASTVARFRRPQSVKQRSNRCTLDN---NEPRLRLVRKRLSFHNDNP
AtIQD16 PSSMQPNYSATSAKAKAR--TQSTPRRRPMTAKK-----RLC-----
AtIQD17 TNAALPNYMAITSAKARIR--SQSAPRQRPSTPEKERIS-----SARKRSLFPVPPPL
AtIQD18 NASLLEPNYMAITSAKARIR--SHSAPRQRPSTPERDRAG-----LVKKRSLFPVPPP
OsIQD14 GAAAVPNYMAITSAKARVR--SQSAPRQRPATPERDRMSFGGGGGGGAKKRSLFPVPI
***:*:*:*:*:*:*:*:*:*:*:*:*:*:*:*:*:*:*:*:*:*:*:*
: : : : :
:

AtIQD15 QSYGYIAG-----DG-YFWYDIDKRTNAHEDFQY-----
AtIQD16 --YAEEESLRSPSFKSCLWG-----DHESDYSCCYGDF--AGKISPCSTTEL--RWL
AtIQD17 PQQMDGQLRSPSFKSIGGSQLG--ALEQQSNYSSCCTESLGGGEISPASTSDYRRWLR
AtIQD18 AEYEDNNSLRSPSFKSVAGSHFGGMLEQQSNYSSCCTESN--GVEISPASTSDFRNWLR
OsIQD14 PYGAYQLRSPSFKSAAGRF---SSEQRSNVSSSCAESLGG--DVVSPSSTDLRRL
: : : : :
:

```

**Figure S3:** Multiple sequence alignment of AtIQD15-18 and OsIQD14 protein sequences. Conserved amino acids are indicated by semicolons and asterisks indicate highly conserved amino acids.

p35s::OsIQD14:GFP  
p35s::TUA6:RFP

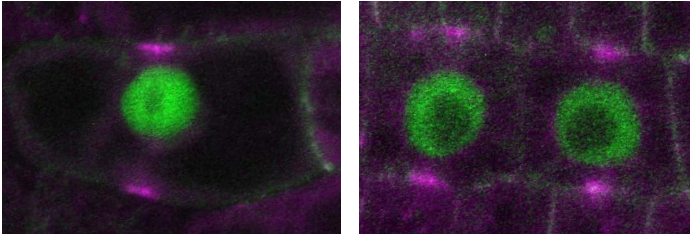

**Figure S4:** OsIQD14:GFP and TUA6:RFP protein localization in Arabidopsis root cells. Preprophase band is marked by TUA6:RFP (magenta), note GFP signal is excluded from RFP signal.

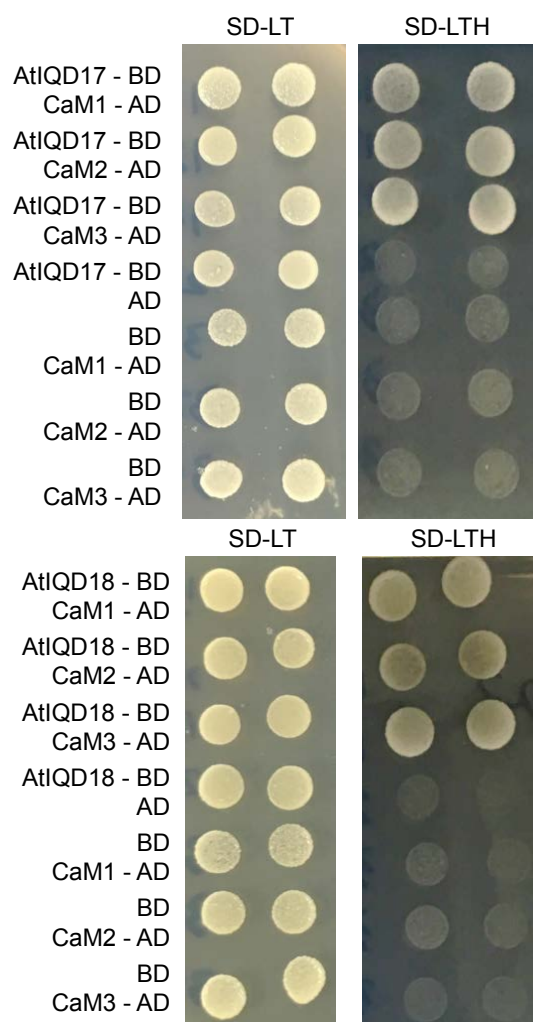

**Figure S5:** Yeast-Two-Hybrid assays showing yeast growth on selection media (SD-LTH), indicating direct interaction of AtIQD17 and AtIQD18 with CaM1-3.

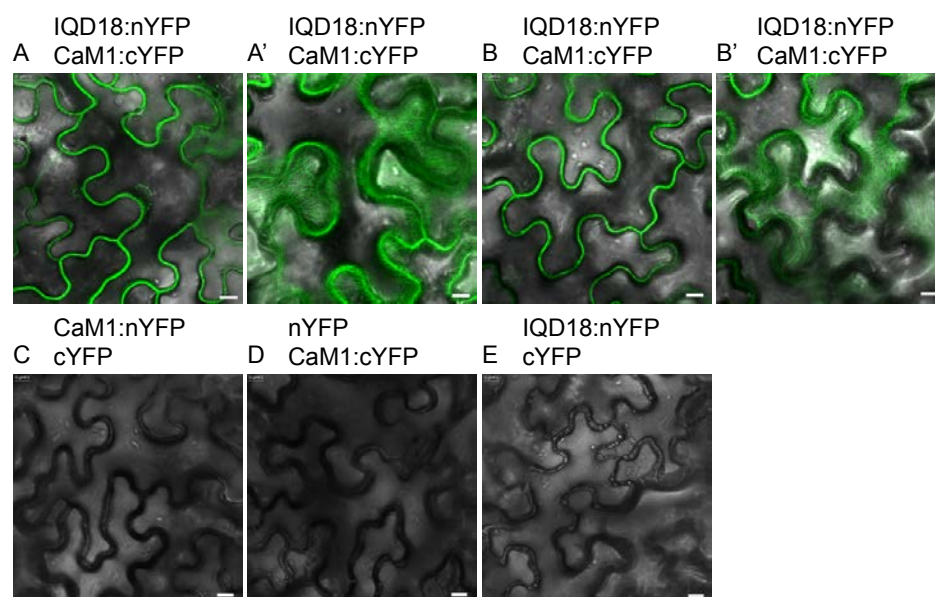

**Figure S6:** Bimolecular Fluorescence Complementation assays showing direct interaction of AtIQD18 and CaM1 in tobacco leaf cells. A' and B' show surface view of pavement cells, revealing binding of AtIQD18-CaM1 complex at cortical microtubules. Measuring bar = 10  $\mu$ M.

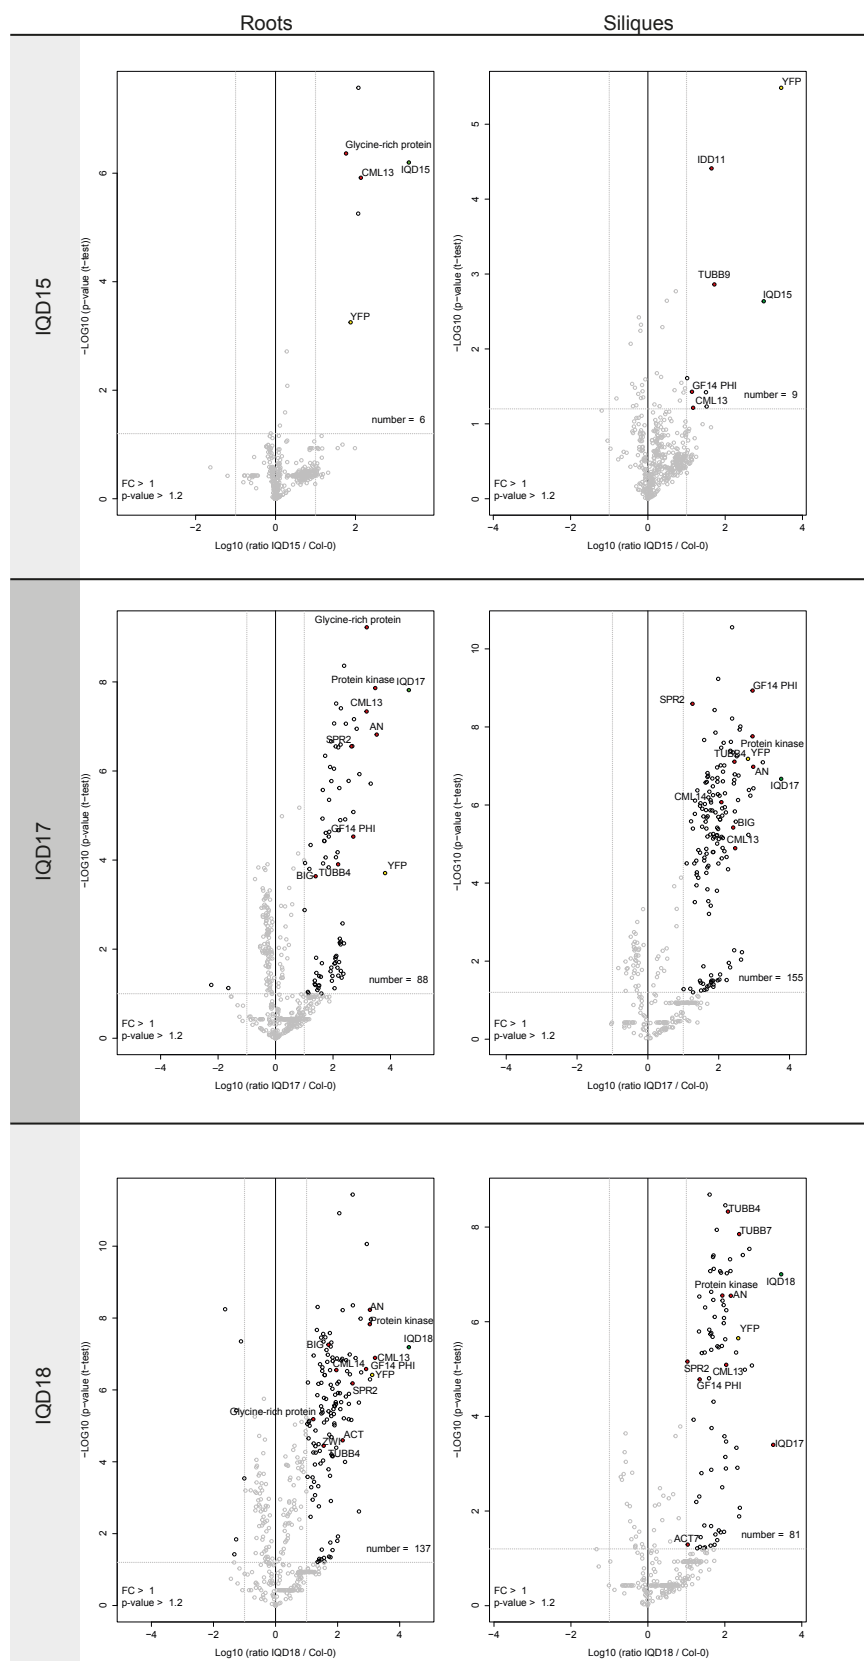

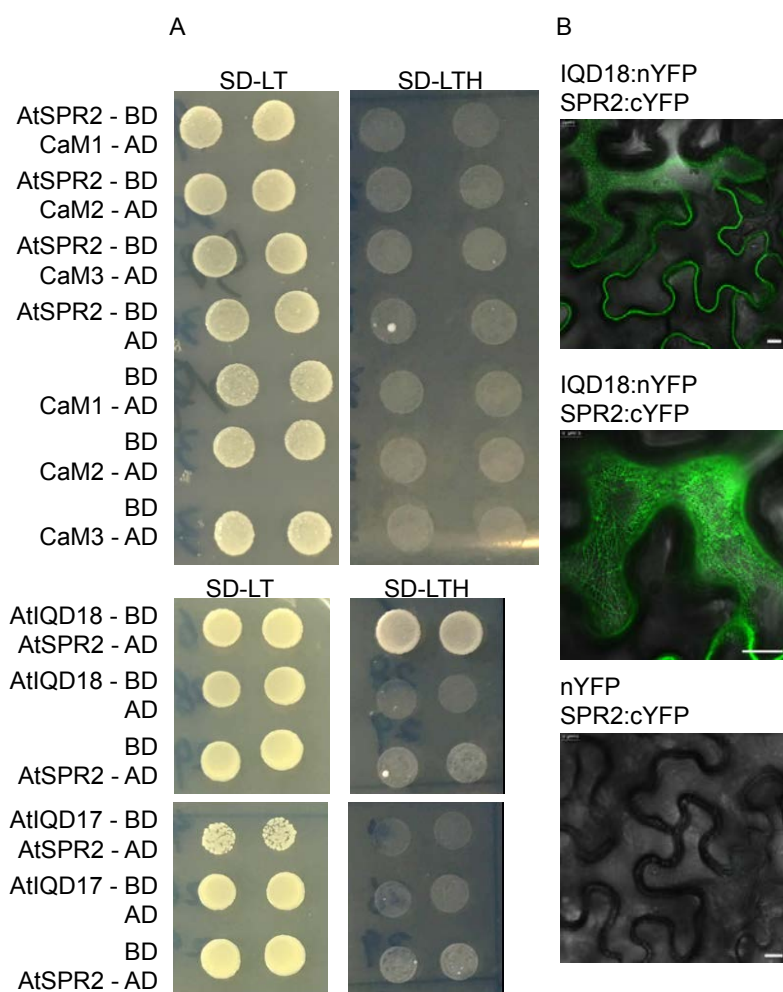

**Figure S8:** AtIQD18 and SPIRAL2 interact directly at the MT. (A) Yeast-Two-Hybrid assays showing yeast growth on selection media (SD-LTH), indicating direct interaction between AtIQD18 and SPR2, but not between SPR2 and CaM1-3 or AtIQD17. (B) Bimolecular Fluorescence Complementation assays showing direct binding between AtIQD18 and SPR2. Middle panel shows surface views of pavement cell, revealing binding of AtIQD18-SPR2 complex at cortical microtubules. Measuring bar = 10  $\mu$ M.



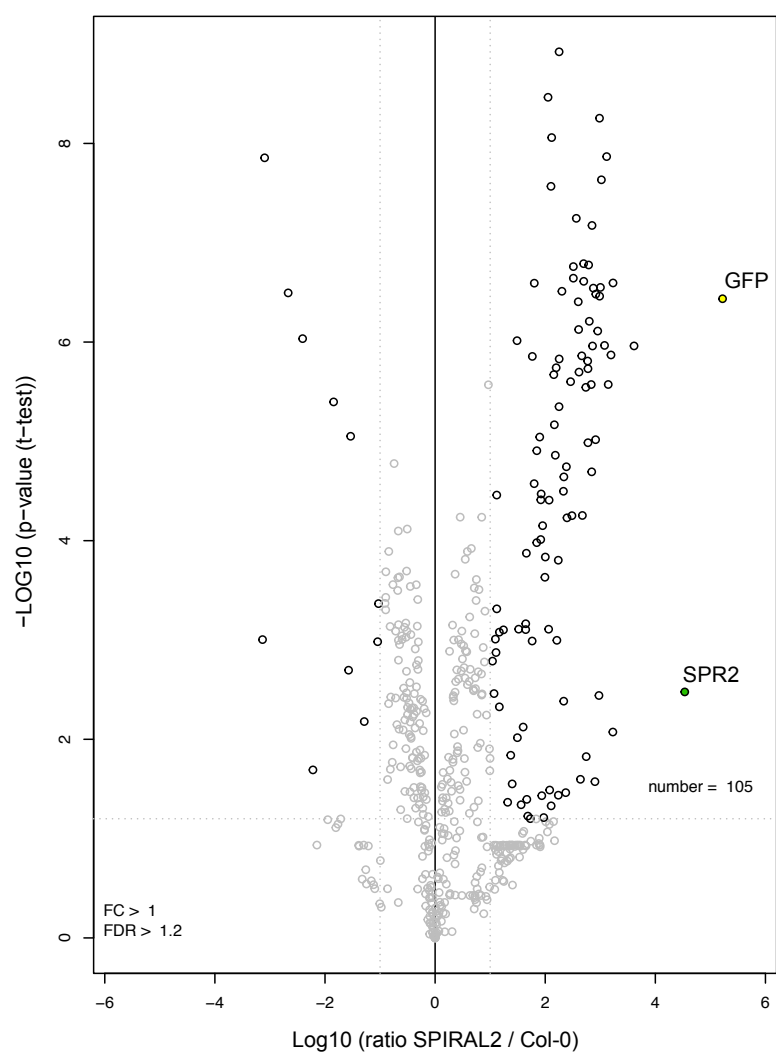

**Figure S9:** Volcano plot showing significantly enriched proteins in SPR2 IP-MS/MS experiment on whole seedlings. YFP protein is indicated as a yellow dot and bait protein as green dot. Non-significant and low-ratio proteins are indicated in grey.

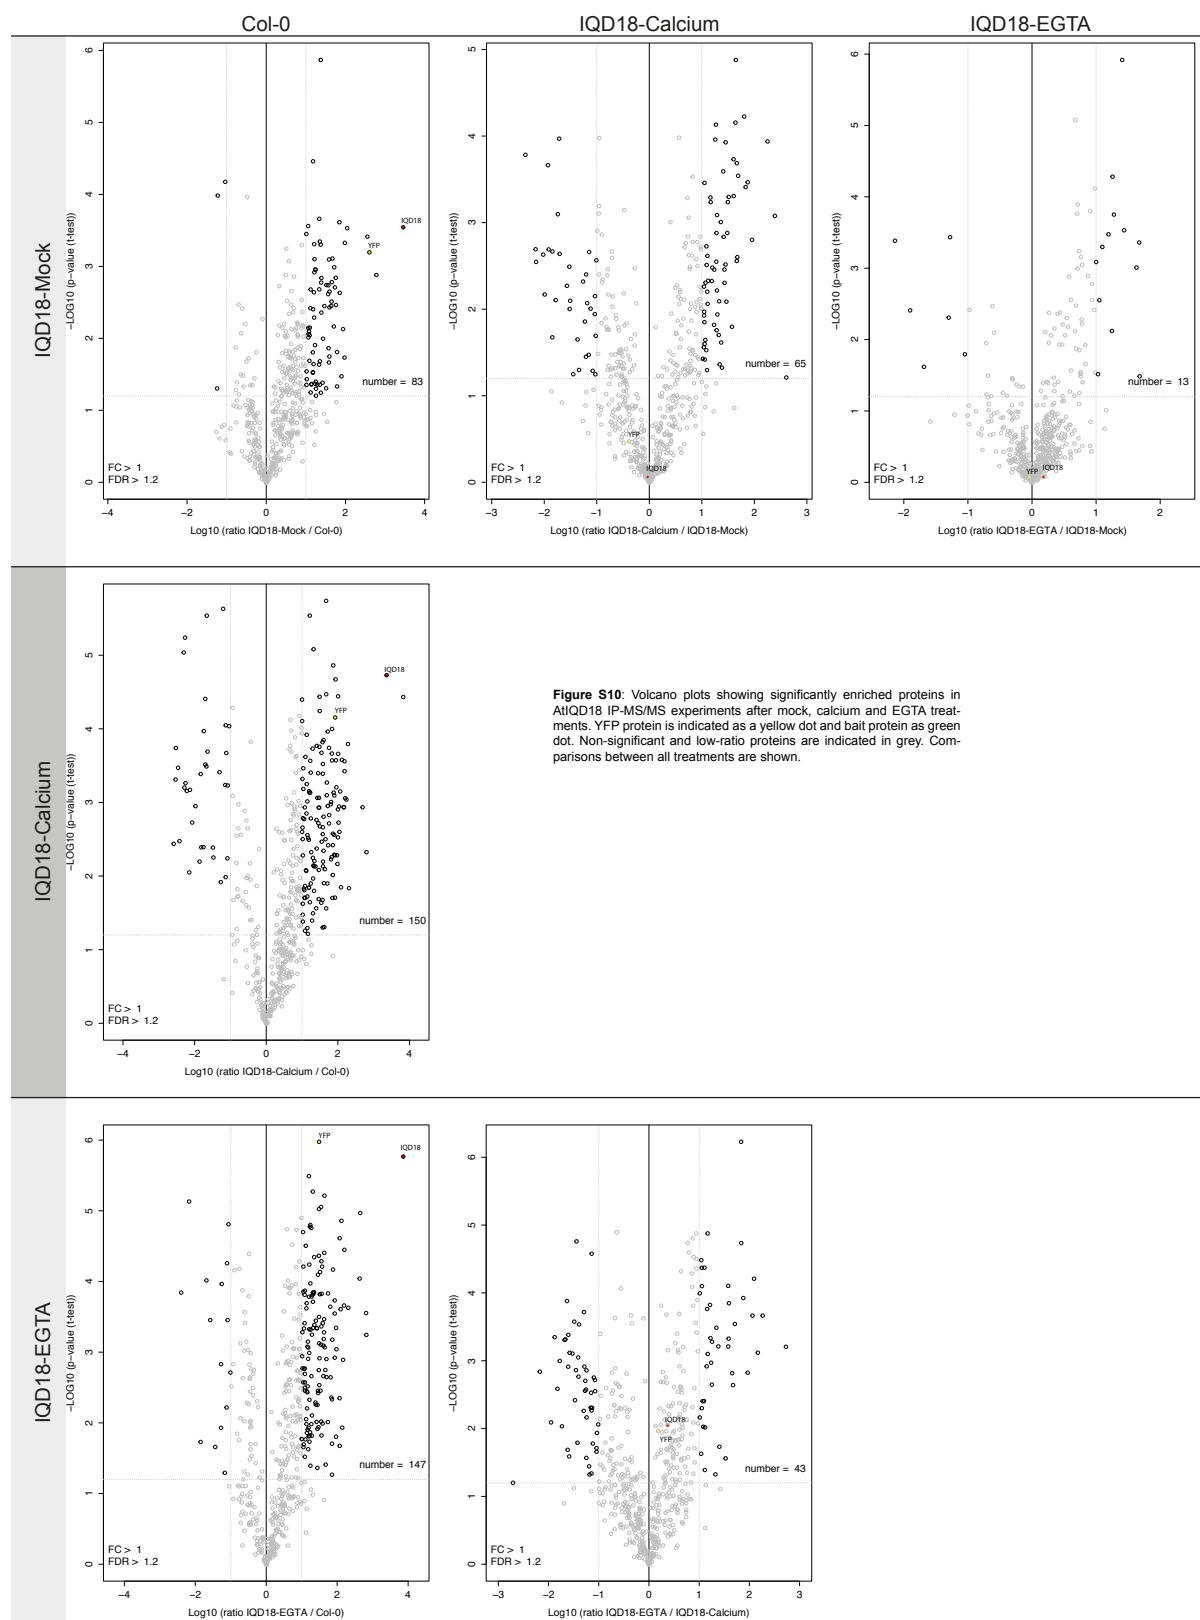

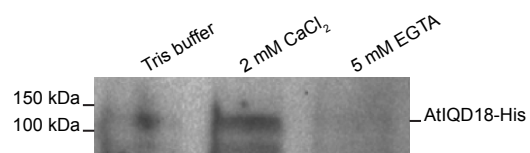

**Figure S11:** Western blot after pull down experiment using recombinant AtIQD18-His proteins and CaM1-agarose beads, showing increased binding between AtIQD18 and CaM after calcium treatment.
